# Supplementary material for: Widespread FRA1-Dependent Control of Mesenchymal Transdifferentiation Programs in Colorectal Cancer Cells
Source: PubMed Central journal article supplement (PMC3962334; doi:10.1371/journal.pone.0088950), 2014-03-21
Supplement: pone.0088950.s001.pdf [file pone.0088950.s001.pdf]

## Supporting Information

### **Widespread FRA1-dependent control of mesenchymal transdifferentiation programs in colorectal cancer cells**

Jeannine Diesch<sup>1,2</sup>, Elaine Sanij<sup>1,3,4</sup>, Omer Gilan<sup>1,2</sup>, Christopher Love<sup>5</sup>, Hoanh Tran<sup>6</sup>, Nicholas I. Fleming<sup>5</sup>, Jason Ellul<sup>1</sup>, Marcia Amalia<sup>1,2</sup>, Izhak Haviv<sup>7</sup>, Richard B. Pearson<sup>1,2,3</sup>, Eugene Tulchinsky<sup>8</sup>, John M. Mariadason<sup>6</sup>, Oliver M. Sieber<sup>5,11</sup>, Ross D. Hannan<sup>1,2,3,9,10,11</sup> and Amardeep S. Dhillon<sup>1,3,4,11\*</sup>

\*To whom correspondence should be addressed: [Amardeep.Dhillon@petermac.org](mailto:Amardeep.Dhillon@petermac.org);

Ph: + 61 3 9656 1279; Fax: + 61 3 9656 1411

**Table S1. Relative changes in expression of FRA1 bound EMT-related genes upon FRA1 knockdown in BE CRC cells. Data represent means from 3 independent RNA-Seq experiments.**

| Gene symbol          | shFRA1-A1 vs shNS (log2) | shFRA1-A2 vs shNS (log2) |
|----------------------|--------------------------|--------------------------|
| <b>ADHESION</b>      |                          |                          |
| CLDN4                | 6.295790479              | 6.876151546              |
| TPM2                 | 2.525388332              | 2.760680361              |
| CDH1                 | 8.257600651              | 8.188627939              |
| CLDN7                | 4.947907433              | 5.025261684              |
| EPCAM                | 6.06897627               | 6.209767802              |
| OLCN                 | 1.844890865              | 1.752921708              |
| TJP3                 | 5.393108929              | 5.440078454              |
| LPXN                 | -5.179435147             | -5.195820698             |
| PCDHB9               | -5.53027117              | -4.851388807             |
| CDH4                 | -8.974351387             | -8.314814613             |
| TPM1                 | -2.721804346             | -2.577430334             |
| TJP2                 | -2.077037931             | -1.952244558             |
| <b>SIGNALING</b>     |                          |                          |
| WNT16                | 9.836522059              | 10.77369936              |
| FZD3                 | 1.476620222              | 1.321437611              |
| WNT10B               | 4.657953714              | 4.71506399               |
| PDGFB                | 3.786449239              | 3.422630213              |
| RAC3                 | 3.131805551              | 3.219393614              |
| NRP1                 | -7.666989679             | -6.204335866             |
| ROBO1                | -9.19985079              | -11.81316047             |
| EGFR                 | -1.888197577             | -2.98739624              |
| RND3                 | -2.607296099             | -3.120533259             |
| RAC2                 | -2.390926409             | -2.282730659             |
| WNT5A                | -10.05601808             | -8.883612275             |
| AXL                  | -4.98352569              | -4.78509022              |
| <b>TRANSCRIPTION</b> |                          |                          |
| SNAI2                | -8.317520305             | -11.02624484             |
| LEF1                 | -9.326497653             | -10.33717393             |
| STAT3                | -1.404080032             | -1.451621599             |
| JUN                  | -3.749516015             | -2.9990092               |
| STAT5B               | -3.752912711             | -3.503903836             |
| ZEB1                 | -4.853994015             | -4.823022834             |
| ETS1                 | -2.727966164             | -2.870310427             |

**ECM**

|          |              |              |
|----------|--------------|--------------|
| RAB25    | 9.9954161    | 9.952912414  |
| TNC      | -10.84675053 | -13.72765288 |
| FBN1     | -6.340193087 | -6.597707995 |
| LAMA3    | -2.866431027 | -2.790325669 |
| ITGA6    | -1.790897657 | -1.917338348 |
| ITGAV    | -1.455695175 | -1.142714962 |
| ITGA3    | -2.007918425 | -1.889281641 |
| LAMC1    | -2.080575652 | -1.692933554 |
| SERPINE1 | -4.230554369 | -4.214337837 |
| LAMC2    | -3.314121432 | -3.218130073 |
| LAMB3    | -3.285678298 | -4.263050812 |
| PLAU     | -4.46943822  | -3.577735794 |
| MMP14    | -3.473348296 | -4.282728087 |
| MMP16    | -7.137263075 | -10.52306725 |
| LAMA4    | -6.075175744 | -5.049612234 |
| ITGA2    | -2.676398874 | -3.165680981 |
| ITGBL1   | -4.787614888 | -4.861324474 |
| ITGA5    | -1.549570822 | -1.747777255 |
| LAMB1    | -3.004725793 | -1.897362424 |
| ITGB2    | -5.290391571 | -4.958685772 |
| PLAUR    | -3.170031299 | -2.302493668 |
| FN1      | -7.845234765 | -7.691191505 |
| VIM      | -10.00237061 | -12.93717126 |

**TGF $\beta$  PATHWAY**

|        |              |              |
|--------|--------------|--------------|
| CD109  | 9.034302717  | 8.57297631   |
| BMP4   | 3.794933632  | 1.032242403  |
| BMP7   | 9.010137623  | 8.831907176  |
| TGFBI  | 6.67         | 6.71         |
| SMAD3  | -2.683074478 | -2.324191377 |
| TGFB2  | -6.969617857 | -6.847828316 |
| TGFBR2 | -4.189646407 | -3.90078682  |
| NOG    | -4.53457067  | -5.873693216 |

**Table S2. ChIP-Seq reads identified near FRA1<sup>EMT</sup> genes.**

| Chr | Start    | End      | Strand | Ensembl geneid  | Gene symbol |
|-----|----------|----------|--------|-----------------|-------------|
| 7   | 73199513 | 73200397 | +      | ENSG00000189143 | CLDN4       |
| 7   | 73205611 | 73206569 | +      | ENSG00000189143 | CLDN4       |
| 7   | 73208087 | 73208769 | +      | ENSG00000189143 | CLDN4       |
| 7   | 73211362 | 73212733 | +      | ENSG00000189143 | CLDN4       |
| 7   | 73217903 | 73218582 | +      | ENSG00000189143 | CLDN4       |
| 7   | 73222154 | 73223061 | +      | ENSG00000189143 | CLDN4       |
| 7   | 73223264 | 73224294 | +      | ENSG00000189143 | CLDN4       |
| 7   | 73224388 | 73225999 | +      | ENSG00000189143 | CLDN4       |
| 7   | 73226088 | 73227210 | +      | ENSG00000189143 | CLDN4       |
| 7   | 73231297 | 73232276 | +      | ENSG00000189143 | CLDN4       |
| 7   | 73236162 | 73237197 | +      | ENSG00000189143 | CLDN4       |
| 7   | 73239033 | 73241022 | +      | ENSG00000189143 | CLDN4       |
| 7   | 73242759 | 73243464 | +      | ENSG00000189143 | CLDN4       |
| 7   | 73245065 | 73246980 | +      | ENSG00000189143 | CLDN4       |
| 6   | 74405521 | 74406286 | +      | ENSG00000156535 | CD109       |
| 6   | 74413466 | 74414095 | +      | ENSG00000156535 | CD109       |
| 6   | 74417743 | 74419203 | +      | ENSG00000156535 | CD109       |
| 6   | 74427171 | 74428022 | +      | ENSG00000156535 | CD109       |
| 6   | 74449184 | 74449818 | +      | ENSG00000156535 | CD109       |
| 6   | 74469465 | 74470402 | +      | ENSG00000156535 | CD109       |
| 6   | 74486009 | 74487080 | +      | ENSG00000156535 | CD109       |
| 6   | 74488850 | 74489457 | +      | ENSG00000156535 | CD109       |
| 6   | 74490567 | 74490972 | +      | ENSG00000156535 | CD109       |
| 6   | 74495439 | 74495992 | +      | ENSG00000156535 | CD109       |
| 6   | 74499024 | 74499852 | +      | ENSG00000156535 | CD109       |
| 6   | 74545048 | 74546981 | +      | ENSG00000156535 | CD109       |
| 6   | 74550211 | 74551188 | +      | ENSG00000156535 | CD109       |
| 1   | 92133752 | 92134186 | -      | ENSG00000069702 | TGFBR3      |
| 1   | 92142225 | 92143099 | -      | ENSG00000069702 | TGFBR3      |
| 1   | 92149135 | 92149504 | -      | ENSG00000069702 | TGFBR3      |
| 1   | 92194414 | 92195021 | -      | ENSG00000069702 | TGFBR3      |
| 1   | 92205408 | 92206340 | -      | ENSG00000069702 | TGFBR3      |
| 1   | 92233330 | 92233826 | -      | ENSG00000069702 | TGFBR3      |
| 1   | 92245979 | 92246499 | -      | ENSG00000069702 | TGFBR3      |
| 1   | 92267817 | 92268246 | -      | ENSG00000069702 | TGFBR3      |
| 1   | 92321509 | 92322036 | -      | ENSG00000069702 | TGFBR3      |

|    |          |          |   |                 |        |
|----|----------|----------|---|-----------------|--------|
| 1  | 92323715 | 92324787 | - | ENSG00000069702 | TGFBR3 |
| 1  | 92338535 | 92339168 | - | ENSG00000069702 | TGFBR3 |
| 1  | 92339944 | 92340424 | - | ENSG00000069702 | TGFBR3 |
| 1  | 92347620 | 92348280 | - | ENSG00000069702 | TGFBR3 |
| 1  | 92350812 | 92352145 | - | ENSG00000069702 | TGFBR3 |
| 1  | 92363764 | 92364526 | - | ENSG00000069702 | TGFBR3 |
| 1  | 92370852 | 92371334 | - | ENSG00000069702 | TGFBR3 |
| 1  | 92376114 | 92376799 | - | ENSG00000069702 | TGFBR3 |
| 1  | 92383747 | 92384874 | - | ENSG00000069702 | TGFBR3 |
| 1  | 92385983 | 92387061 | - | ENSG00000069702 | TGFBR3 |
| 1  | 92388857 | 92389527 | - | ENSG00000069702 | TGFBR3 |
| 14 | 54403726 | 54404224 | - | ENSG00000125378 | BMP4   |
| 14 | 54412738 | 54413979 | - | ENSG00000125378 | BMP4   |
| 14 | 54416685 | 54417394 | - | ENSG00000125378 | BMP4   |
| 14 | 54420021 | 54421089 | - | ENSG00000125378 | BMP4   |
| 14 | 54422342 | 54423934 | - | ENSG00000125378 | BMP4   |
| 14 | 54429842 | 54430902 | - | ENSG00000125378 | BMP4   |
| 14 | 54433802 | 54434482 | - | ENSG00000125378 | BMP4   |
| 14 | 54436525 | 54437369 | - | ENSG00000125378 | BMP4   |
| 20 | 55731983 | 55732560 | - | ENSG00000101144 | BMP7   |
| 20 | 55732663 | 55733560 | - | ENSG00000101144 | BMP7   |
| 20 | 55735919 | 55737743 | - | ENSG00000101144 | BMP7   |
| 20 | 55739679 | 55740454 | - | ENSG00000101144 | BMP7   |
| 20 | 55740514 | 55742416 | - | ENSG00000101144 | BMP7   |
| 20 | 55748074 | 55748803 | - | ENSG00000101144 | BMP7   |
| 20 | 55752237 | 55754932 | - | ENSG00000101144 | BMP7   |
| 20 | 55755019 | 55755892 | - | ENSG00000101144 | BMP7   |
| 20 | 55756919 | 55757769 | - | ENSG00000101144 | BMP7   |
| 20 | 55764495 | 55766140 | - | ENSG00000101144 | BMP7   |
| 20 | 55769714 | 55771078 | - | ENSG00000101144 | BMP7   |
| 20 | 55772818 | 55775359 | - | ENSG00000101144 | BMP7   |
| 20 | 55778301 | 55778955 | - | ENSG00000101144 | BMP7   |
| 20 | 55782592 | 55783294 | - | ENSG00000101144 | BMP7   |
| 20 | 55798627 | 55800471 | - | ENSG00000101144 | BMP7   |
| 20 | 55800724 | 55802179 | - | ENSG00000101144 | BMP7   |
| 20 | 55818380 | 55819272 | - | ENSG00000101144 | BMP7   |
| 20 | 55825835 | 55826432 | - | ENSG00000101144 | BMP7   |
| 20 | 55839181 | 55843214 | - | ENSG00000101144 | BMP7   |
| 15 | 67357104 | 67359319 | + | ENSG00000166949 | SMAD3  |

|    |           |           |   |                 |       |
|----|-----------|-----------|---|-----------------|-------|
| 15 | 67361934  | 67362493  | + | ENSG00000166949 | SMAD3 |
| 15 | 67365880  | 67366477  | + | ENSG00000166949 | SMAD3 |
| 15 | 67413343  | 67413932  | + | ENSG00000166949 | SMAD3 |
| 15 | 67442889  | 67444164  | + | ENSG00000166949 | SMAD3 |
| 15 | 67456949  | 67458256  | + | ENSG00000166949 | SMAD3 |
| 15 | 67459962  | 67460914  | + | ENSG00000166949 | SMAD3 |
| 15 | 67472098  | 67473284  | + | ENSG00000166949 | SMAD3 |
| 15 | 67473383  | 67474480  | + | ENSG00000166949 | SMAD3 |
| 15 | 67481507  | 67482193  | + | ENSG00000166949 | SMAD3 |
| 10 | 123205221 | 123205790 | - | ENSG00000066468 | FGFR2 |
| 2  | 47594236  | 47595256  | + | ENSG00000119888 | EPCAM |
| 2  | 47595426  | 47598092  | + | ENSG00000119888 | EPCAM |
| 2  | 47599316  | 47600400  | + | ENSG00000119888 | EPCAM |
| 2  | 47609917  | 47611160  | + | ENSG00000119888 | EPCAM |
| 2  | 47611175  | 47612227  | + | ENSG00000119888 | EPCAM |
| 2  | 47614041  | 47615170  | + | ENSG00000119888 | EPCAM |
| 2  | 47617276  | 47618060  | + | ENSG00000119888 | EPCAM |
| 19 | 41720206  | 41721304  | + | ENSG00000167601 | AXL   |
| 19 | 41724438  | 41726773  | + | ENSG00000167601 | AXL   |
| 19 | 41727514  | 41728773  | + | ENSG00000167601 | AXL   |
| 19 | 41729222  | 41730350  | + | ENSG00000167601 | AXL   |
| 19 | 41731457  | 41733185  | + | ENSG00000167601 | AXL   |
| 19 | 41742898  | 41747468  | + | ENSG00000167601 | AXL   |
| 19 | 41754998  | 41755842  | + | ENSG00000167601 | AXL   |
| 19 | 41756000  | 41757682  | + | ENSG00000167601 | AXL   |
| 19 | 41759711  | 41760622  | + | ENSG00000167601 | AXL   |
| 19 | 41761094  | 41761950  | + | ENSG00000167601 | AXL   |
| 19 | 41765359  | 41766591  | + | ENSG00000167601 | AXL   |
| 5  | 135339438 | 135339942 | + | ENSG00000120708 | TGFBI |
| 5  | 135364095 | 135365544 | + | ENSG00000120708 | TGFBI |
| 5  | 135381904 | 135382275 | + | ENSG00000120708 | TGFBI |
| 5  | 135402462 | 135402939 | + | ENSG00000120708 | TGFBI |
| 11 | 58299067  | 58300192  | - | ENSG00000110031 | LPXN  |
| 11 | 58321364  | 58321992  | - | ENSG00000110031 | LPXN  |
| 15 | 48817164  | 48817746  | - | ENSG00000166147 | FBN1  |
| 15 | 48870559  | 48871200  | - | ENSG00000166147 | FBN1  |
| 15 | 48897682  | 48898177  | - | ENSG00000166147 | FBN1  |
| 15 | 48903305  | 48903908  | - | ENSG00000166147 | FBN1  |
| 15 | 48905689  | 48906249  | - | ENSG00000166147 | FBN1  |

|    |           |           |   |                 |        |
|----|-----------|-----------|---|-----------------|--------|
| 15 | 48936795  | 48938624  | - | ENSG00000166147 | FBN1   |
| 1  | 183144103 | 183144720 | + | ENSG00000058085 | LAMC2  |
| 1  | 183150523 | 183151322 | + | ENSG00000058085 | LAMC2  |
| 1  | 183154874 | 183155698 | + | ENSG00000058085 | LAMC2  |
| 9  | 117839117 | 117839894 | - | ENSG00000041982 | TNC    |
| 9  | 117847910 | 117849615 | - | ENSG00000041982 | TNC    |
| 9  | 117852669 | 117853490 | - | ENSG00000041982 | TNC    |
| 1  | 209790660 | 209792394 | - | ENSG00000196878 | LAMB3  |
| 1  | 209795578 | 209797515 | - | ENSG00000196878 | LAMB3  |
| 1  | 209798755 | 209799499 | - | ENSG00000196878 | LAMB3  |
| 1  | 209799815 | 209801939 | - | ENSG00000196878 | LAMB3  |
| 1  | 209803805 | 209804687 | - | ENSG00000196878 | LAMB3  |
| 1  | 209807401 | 209808621 | - | ENSG00000196878 | LAMB3  |
| 10 | 75654955  | 75656684  | + | ENSG00000122861 | PLAU   |
| 10 | 75670520  | 75671907  | + | ENSG00000122861 | PLAU   |
| 19 | 44148760  | 44150146  | - | ENSG00000011422 | PLAUR  |
| 19 | 44150851  | 44151252  | - | ENSG00000011422 | PLAUR  |
| 19 | 44154162  | 44154771  | - | ENSG00000011422 | PLAUR  |
| 19 | 44155007  | 44156198  | - | ENSG00000011422 | PLAUR  |
| 19 | 44158351  | 44159434  | - | ENSG00000011422 | PLAUR  |
| 19 | 44159851  | 44161729  | - | ENSG00000011422 | PLAUR  |
| 19 | 44169018  | 44170360  | - | ENSG00000011422 | PLAUR  |
| 19 | 44171528  | 44172282  | - | ENSG00000011422 | PLAUR  |
| 19 | 44172654  | 44174633  | - | ENSG00000011422 | PLAUR  |
| 19 | 44179710  | 44180671  | - | ENSG00000011422 | PLAUR  |
| 19 | 44181667  | 44182392  | - | ENSG00000011422 | PLAUR  |
| 19 | 44184971  | 44185664  | - | ENSG00000011422 | PLAUR  |
| 19 | 44186555  | 44187139  | - | ENSG00000011422 | PLAUR  |
| 19 | 44191484  | 44192232  | - | ENSG00000011422 | PLAUR  |
| 3  | 30629847  | 30630379  | + | ENSG00000163513 | TGFBR2 |
| 3  | 30632693  | 30633410  | + | ENSG00000163513 | TGFBR2 |
| 3  | 30647769  | 30649022  | + | ENSG00000163513 | TGFBR2 |
| 3  | 30649347  | 30649833  | + | ENSG00000163513 | TGFBR2 |
| 3  | 30659570  | 30660143  | + | ENSG00000163513 | TGFBR2 |
| 3  | 30678073  | 30678673  | + | ENSG00000163513 | TGFBR2 |
| 3  | 30694580  | 30695177  | + | ENSG00000163513 | TGFBR2 |
| 3  | 30719570  | 30720120  | + | ENSG00000163513 | TGFBR2 |
| 6  | 112445804 | 112446321 | - | ENSG00000112769 | LAMA4  |
| 6  | 112457500 | 112457989 | - | ENSG00000112769 | LAMA4  |

|    |           |           |   |                 |        |
|----|-----------|-----------|---|-----------------|--------|
| 6  | 112502859 | 112503323 | - | ENSG00000112769 | LAMA4  |
| 6  | 112511904 | 112512554 | - | ENSG00000112769 | LAMA4  |
| 6  | 112532951 | 112533767 | - | ENSG00000112769 | LAMA4  |
| 11 | 127845612 | 127846709 | - | ENSG00000134954 | ETS1   |
| 11 | 127868765 | 127869322 | - | ENSG00000134954 | ETS1   |
| 11 | 127902786 | 127903385 | - | ENSG00000134954 | ETS1   |
| 11 | 128009832 | 128010536 | - | ENSG00000134954 | ETS1   |
| 11 | 128084686 | 128085854 | - | ENSG00000134954 | ETS1   |
| 11 | 128092781 | 128093738 | - | ENSG00000134954 | ETS1   |
| 11 | 128106707 | 128107738 | - | ENSG00000134954 | ETS1   |
| 11 | 128111614 | 128112048 | - | ENSG00000134954 | ETS1   |
| 11 | 128189066 | 128189513 | - | ENSG00000134954 | ETS1   |
| 11 | 128210432 | 128210950 | - | ENSG00000134954 | ETS1   |
| 11 | 128292414 | 128292968 | - | ENSG00000134954 | ETS1   |
| 11 | 128295389 | 128296054 | - | ENSG00000134954 | ETS1   |
| 11 | 128345300 | 128345785 | - | ENSG00000134954 | ETS1   |
| 11 | 128428073 | 128428600 | - | ENSG00000134954 | ETS1   |
| 11 | 128489281 | 128489839 | - | ENSG00000134954 | ETS1   |
| 11 | 128502289 | 128502751 | - | ENSG00000134954 | ETS1   |
| 17 | 40351455  | 40352115  | - | ENSG00000173757 | STAT5B |
| 17 | 40353736  | 40354783  | - | ENSG00000173757 | STAT5B |
| 17 | 40357754  | 40359166  | - | ENSG00000173757 | STAT5B |
| 17 | 40359624  | 40361287  | - | ENSG00000173757 | STAT5B |
| 17 | 40365169  | 40366160  | - | ENSG00000173757 | STAT5B |
| 17 | 40367532  | 40368244  | - | ENSG00000173757 | STAT5B |
| 17 | 40369478  | 40372404  | - | ENSG00000173757 | STAT5B |
| 17 | 40372472  | 40373402  | - | ENSG00000173757 | STAT5B |
| 17 | 40373470  | 40374411  | - | ENSG00000173757 | STAT5B |
| 17 | 40378377  | 40379405  | - | ENSG00000173757 | STAT5B |
| 17 | 40380238  | 40381016  | - | ENSG00000173757 | STAT5B |
| 17 | 40385393  | 40385817  | - | ENSG00000173757 | STAT5B |
| 17 | 40387330  | 40387887  | - | ENSG00000173757 | STAT5B |
| 17 | 40388406  | 40388913  | - | ENSG00000173757 | STAT5B |
| 17 | 40389652  | 40390744  | - | ENSG00000173757 | STAT5B |
| 17 | 40396980  | 40398123  | - | ENSG00000173757 | STAT5B |
| 17 | 40427479  | 40429191  | - | ENSG00000173757 | STAT5B |
| 7  | 107581975 | 107582783 | - | ENSG00000091136 | LAMB1  |
| 7  | 107592031 | 107592683 | - | ENSG00000091136 | LAMB1  |
| 7  | 107594676 | 107595260 | - | ENSG00000091136 | LAMB1  |



|    |           |           |   |                 |       |
|----|-----------|-----------|---|-----------------|-------|
| 7  | 107596039 | 107596760 | - | ENSG00000091136 | LAMB1 |
| 7  | 107597434 | 107598040 | - | ENSG00000091136 | LAMB1 |
| 7  | 107606310 | 107606955 | - | ENSG00000091136 | LAMB1 |
| 7  | 107617187 | 107617741 | - | ENSG00000091136 | LAMB1 |
| 7  | 107621316 | 107621880 | - | ENSG00000091136 | LAMB1 |
| 7  | 107625760 | 107626461 | - | ENSG00000091136 | LAMB1 |
| 7  | 107633466 | 107634008 | - | ENSG00000091136 | LAMB1 |
| 7  | 107641691 | 107642777 | - | ENSG00000091136 | LAMB1 |
| 7  | 107643656 | 107644061 | - | ENSG00000091136 | LAMB1 |
| 7  | 107651702 | 107652205 | - | ENSG00000091136 | LAMB1 |
| 12 | 54798618  | 54799559  | - | ENSG00000161638 | ITGA5 |
| 12 | 54801822  | 54804196  | - | ENSG00000161638 | ITGA5 |
| 12 | 54808188  | 54808933  | - | ENSG00000161638 | ITGA5 |
| 12 | 54809419  | 54810150  | - | ENSG00000161638 | ITGA5 |
| 12 | 54812076  | 54813318  | - | ENSG00000161638 | ITGA5 |
| 12 | 54827481  | 54828315  | - | ENSG00000161638 | ITGA5 |
| 12 | 54828391  | 54828844  | - | ENSG00000161638 | ITGA5 |
| 17 | 48137179  | 48137953  | + | ENSG00000005884 | ITGA3 |
| 17 | 48138240  | 48140311  | + | ENSG00000005884 | ITGA3 |
| 17 | 48141023  | 48142621  | + | ENSG00000005884 | ITGA3 |
| 17 | 48145081  | 48146768  | + | ENSG00000005884 | ITGA3 |
| 17 | 48149389  | 48150257  | + | ENSG00000005884 | ITGA3 |
| 17 | 48150674  | 48152312  | + | ENSG00000005884 | ITGA3 |
| 17 | 48152600  | 48153407  | + | ENSG00000005884 | ITGA3 |
| 17 | 48153412  | 48155158  | + | ENSG00000005884 | ITGA3 |
| 17 | 48156049  | 48158040  | + | ENSG00000005884 | ITGA3 |
| 17 | 48159160  | 48160096  | + | ENSG00000005884 | ITGA3 |
| 17 | 48163658  | 48164472  | + | ENSG00000005884 | ITGA3 |
| 17 | 48164650  | 48165987  | + | ENSG00000005884 | ITGA3 |
| 17 | 48166030  | 48168371  | + | ENSG00000005884 | ITGA3 |
| 1  | 182985051 | 182985788 | + | ENSG00000135862 | LAMC1 |
| 1  | 182986464 | 182986852 | + | ENSG00000135862 | LAMC1 |
| 1  | 182989367 | 182990281 | + | ENSG00000135862 | LAMC1 |
| 1  | 182991803 | 182993820 | + | ENSG00000135862 | LAMC1 |
| 1  | 183003256 | 183003794 | + | ENSG00000135862 | LAMC1 |
| 1  | 183005245 | 183006209 | + | ENSG00000135862 | LAMC1 |
| 1  | 183019261 | 183020089 | + | ENSG00000135862 | LAMC1 |
| 1  | 183022728 | 183023166 | + | ENSG00000135862 | LAMC1 |
| 1  | 183047286 | 183047709 | + | ENSG00000135862 | LAMC1 |

|    |           |           |   |                 |       |
|----|-----------|-----------|---|-----------------|-------|
| 1  | 183056793 | 183057350 | + | ENSG00000135862 | LAMC1 |
| 1  | 183080066 | 183080591 | + | ENSG00000135862 | LAMC1 |
| 1  | 183084831 | 183085760 | + | ENSG00000135862 | LAMC1 |
| 1  | 183087429 | 183088369 | + | ENSG00000135862 | LAMC1 |
| 1  | 183118338 | 183119585 | + | ENSG00000135862 | LAMC1 |
| 9  | 71751987  | 71752723  | + | ENSG00000119139 | TJP2  |
| 9  | 71764918  | 71765624  | + | ENSG00000119139 | TJP2  |
| 9  | 71788712  | 71789592  | + | ENSG00000119139 | TJP2  |
| 9  | 71794262  | 71794728  | + | ENSG00000119139 | TJP2  |
| 9  | 71806504  | 71807228  | + | ENSG00000119139 | TJP2  |
| 9  | 71821207  | 71821946  | + | ENSG00000119139 | TJP2  |
| 9  | 71823971  | 71824692  | + | ENSG00000119139 | TJP2  |
| 9  | 71827932  | 71828360  | + | ENSG00000119139 | TJP2  |
| 9  | 71833698  | 71834274  | + | ENSG00000119139 | TJP2  |
| 9  | 71835705  | 71837562  | + | ENSG00000119139 | TJP2  |
| 9  | 71837577  | 71838598  | + | ENSG00000119139 | TJP2  |
| 9  | 71850060  | 71850655  | + | ENSG00000119139 | TJP2  |
| 9  | 71868864  | 71869563  | + | ENSG00000119139 | TJP2  |
| 9  | 71873651  | 71874377  | + | ENSG00000119139 | TJP2  |
| 9  | 71878681  | 71879334  | + | ENSG00000119139 | TJP2  |
| 9  | 71879888  | 71880386  | + | ENSG00000119139 | TJP2  |
| 9  | 71883765  | 71884266  | + | ENSG00000119139 | TJP2  |
| 9  | 71889784  | 71890312  | + | ENSG00000119139 | TJP2  |
| 9  | 71891993  | 71893460  | + | ENSG00000119139 | TJP2  |
| 9  | 71896680  | 71897503  | + | ENSG00000119139 | TJP2  |
| 2  | 187431364 | 187431949 | + | ENSG00000138448 | ITGAV |
| 2  | 187436040 | 187436560 | + | ENSG00000138448 | ITGAV |
| 2  | 187438843 | 187439403 | + | ENSG00000138448 | ITGAV |
| 2  | 187451700 | 187452409 | + | ENSG00000138448 | ITGAV |
| 2  | 187452895 | 187453551 | + | ENSG00000138448 | ITGAV |
| 2  | 187454340 | 187455426 | + | ENSG00000138448 | ITGAV |
| 2  | 187467172 | 187467696 | + | ENSG00000138448 | ITGAV |
| 2  | 187480872 | 187481435 | + | ENSG00000138448 | ITGAV |
| 2  | 187510051 | 187510888 | + | ENSG00000138448 | ITGAV |
| 2  | 187513122 | 187513541 | + | ENSG00000138448 | ITGAV |
| 2  | 187517493 | 187518103 | + | ENSG00000138448 | ITGAV |
| 2  | 187536509 | 187537024 | + | ENSG00000138448 | ITGAV |
| 2  | 187538272 | 187538977 | + | ENSG00000138448 | ITGAV |
| 17 | 40466779  | 40467320  | - | ENSG00000168610 | STAT3 |

|    |          |          |   |                 |       |
|----|----------|----------|---|-----------------|-------|
| 17 | 40481987 | 40483006 | - | ENSG00000168610 | STAT3 |
| 17 | 40483616 | 40484599 | - | ENSG00000168610 | STAT3 |
| 17 | 40490877 | 40491340 | - | ENSG00000168610 | STAT3 |
| 17 | 40491846 | 40492494 | - | ENSG00000168610 | STAT3 |
| 17 | 40496005 | 40497413 | - | ENSG00000168610 | STAT3 |
| 17 | 40506054 | 40506789 | - | ENSG00000168610 | STAT3 |
| 17 | 40518830 | 40519709 | - | ENSG00000168610 | STAT3 |
| 17 | 40521610 | 40522899 | - | ENSG00000168610 | STAT3 |
| 17 | 40523254 | 40524055 | - | ENSG00000168610 | STAT3 |
| 17 | 40529876 | 40530655 | - | ENSG00000168610 | STAT3 |
| 17 | 40531922 | 40533007 | - | ENSG00000168610 | STAT3 |
| 17 | 40534533 | 40535675 | - | ENSG00000168610 | STAT3 |
| 17 | 40535849 | 40536979 | - | ENSG00000168610 | STAT3 |
| 17 | 40539563 | 40540999 | - | ENSG00000168610 | STAT3 |
| 18 | 21269174 | 21270329 | + | ENSG00000053747 | LAMA3 |
| 18 | 21278018 | 21278587 | + | ENSG00000053747 | LAMA3 |
| 18 | 21320688 | 21321167 | + | ENSG00000053747 | LAMA3 |
| 18 | 21321682 | 21322210 | + | ENSG00000053747 | LAMA3 |
| 18 | 21341937 | 21343157 | + | ENSG00000053747 | LAMA3 |
| 18 | 21356583 | 21357112 | + | ENSG00000053747 | LAMA3 |
| 18 | 21370705 | 21371399 | + | ENSG00000053747 | LAMA3 |
| 18 | 21391423 | 21392299 | + | ENSG00000053747 | LAMA3 |
| 18 | 21422285 | 21422642 | + | ENSG00000053747 | LAMA3 |
| 18 | 21474670 | 21475138 | + | ENSG00000053747 | LAMA3 |
| 18 | 21499497 | 21499927 | + | ENSG00000053747 | LAMA3 |
| 18 | 21504067 | 21504794 | + | ENSG00000053747 | LAMA3 |
| 18 | 21520555 | 21521414 | + | ENSG00000053747 | LAMA3 |
| 18 | 21524768 | 21525481 | + | ENSG00000053747 | LAMA3 |
| 3  | 78631839 | 78633556 | - | ENSG00000169855 | ROBO1 |
| 3  | 78729316 | 78730529 | - | ENSG00000169855 | ROBO1 |
| 3  | 78760266 | 78760907 | - | ENSG00000169855 | ROBO1 |
| 3  | 78764608 | 78765138 | - | ENSG00000169855 | ROBO1 |
| 3  | 78988344 | 78988804 | - | ENSG00000169855 | ROBO1 |
| 3  | 79012384 | 79012965 | - | ENSG00000169855 | ROBO1 |
| 3  | 79067788 | 79068952 | - | ENSG00000169855 | ROBO1 |
| 3  | 79070668 | 79071269 | - | ENSG00000169855 | ROBO1 |
| 3  | 79138988 | 79139485 | - | ENSG00000169855 | ROBO1 |
| 3  | 79168844 | 79169338 | - | ENSG00000169855 | ROBO1 |
| 3  | 79179795 | 79180596 | - | ENSG00000169855 | ROBO1 |

|    |          |          |   |                 |       |
|----|----------|----------|---|-----------------|-------|
| 3  | 79182129 | 79182751 | - | ENSG00000169855 | ROBO1 |
| 3  | 79215594 | 79216056 | - | ENSG00000169855 | ROBO1 |
| 3  | 79222223 | 79223224 | - | ENSG00000169855 | ROBO1 |
| 3  | 79246120 | 79247008 | - | ENSG00000169855 | ROBO1 |
| 3  | 79257679 | 79258131 | - | ENSG00000169855 | ROBO1 |
| 3  | 79286212 | 79286725 | - | ENSG00000169855 | ROBO1 |
| 3  | 79332690 | 79333315 | - | ENSG00000169855 | ROBO1 |
| 3  | 79339110 | 79339540 | - | ENSG00000169855 | ROBO1 |
| 3  | 79349075 | 79350113 | - | ENSG00000169855 | ROBO1 |
| 3  | 79372070 | 79372562 | - | ENSG00000169855 | ROBO1 |
| 3  | 79412990 | 79413411 | - | ENSG00000169855 | ROBO1 |
| 3  | 79416927 | 79417412 | - | ENSG00000169855 | ROBO1 |
| 3  | 79421243 | 79421787 | - | ENSG00000169855 | ROBO1 |
| 3  | 79430020 | 79430683 | - | ENSG00000169855 | ROBO1 |
| 3  | 79494505 | 79495333 | - | ENSG00000169855 | ROBO1 |
| 3  | 79545241 | 79545946 | - | ENSG00000169855 | ROBO1 |
| 3  | 79549912 | 79550283 | - | ENSG00000169855 | ROBO1 |
| 3  | 79551136 | 79552160 | - | ENSG00000169855 | ROBO1 |
| 3  | 79555455 | 79555964 | - | ENSG00000169855 | ROBO1 |
| 3  | 79568340 | 79568853 | - | ENSG00000169855 | ROBO1 |
| 3  | 79660461 | 79661927 | - | ENSG00000169855 | ROBO1 |
| 3  | 79733728 | 79734153 | - | ENSG00000169855 | ROBO1 |
| 3  | 79769839 | 79770485 | - | ENSG00000169855 | ROBO1 |
| 3  | 79774222 | 79774780 | - | ENSG00000169855 | ROBO1 |
| 3  | 79815450 | 79816720 | - | ENSG00000169855 | ROBO1 |
| 3  | 79834126 | 79834656 | - | ENSG00000169855 | ROBO1 |
| 3  | 79863606 | 79864372 | - | ENSG00000169855 | ROBO1 |
| 3  | 79873165 | 79873836 | - | ENSG00000169855 | ROBO1 |
| 10 | 33460696 | 33461147 | - | ENSG00000099250 | NRP1  |
| 10 | 33477323 | 33477830 | - | ENSG00000099250 | NRP1  |
| 10 | 33492500 | 33492925 | - | ENSG00000099250 | NRP1  |
| 10 | 33493529 | 33493994 | - | ENSG00000099250 | NRP1  |
| 10 | 33497676 | 33498114 | - | ENSG00000099250 | NRP1  |
| 10 | 33504877 | 33505709 | - | ENSG00000099250 | NRP1  |
| 10 | 33559098 | 33559672 | - | ENSG00000099250 | NRP1  |
| 10 | 33566249 | 33566607 | - | ENSG00000099250 | NRP1  |
| 10 | 33623035 | 33626337 | - | ENSG00000099250 | NRP1  |
| 10 | 33675991 | 33676937 | - | ENSG00000099250 | NRP1  |
| 10 | 33705638 | 33706045 | - | ENSG00000099250 | NRP1  |

|    |           |           |   |                 |       |
|----|-----------|-----------|---|-----------------|-------|
| 10 | 33707507  | 33708112  | - | ENSG00000099250 | NRP1  |
| 10 | 33709071  | 33709652  | - | ENSG00000099250 | NRP1  |
| 10 | 33727722  | 33728371  | - | ENSG00000099250 | NRP1  |
| 10 | 33730971  | 33731871  | - | ENSG00000099250 | NRP1  |
| 14 | 23305534  | 23307093  | + | ENSG00000157227 | MMP14 |
| 14 | 23309441  | 23310355  | + | ENSG00000157227 | MMP14 |
| 14 | 23311258  | 23312029  | + | ENSG00000157227 | MMP14 |
| 14 | 23314892  | 23315623  | + | ENSG00000157227 | MMP14 |
| 14 | 23315741  | 23316679  | + | ENSG00000157227 | MMP14 |
| 14 | 23317640  | 23318273  | + | ENSG00000157227 | MMP14 |
| 8  | 89092501  | 89092972  | - | ENSG00000156103 | MMP16 |
| 8  | 89161038  | 89162177  | - | ENSG00000156103 | MMP16 |
| 8  | 89163070  | 89163968  | - | ENSG00000156103 | MMP16 |
| 8  | 89169878  | 89171040  | - | ENSG00000156103 | MMP16 |
| 8  | 89339501  | 89340541  | - | ENSG00000156103 | MMP16 |
| 10 | 17270013  | 17272890  | + | ENSG00000026025 | VIM   |
| 10 | 17275993  | 17276623  | + | ENSG00000026025 | VIM   |
| 10 | 17314436  | 17315186  | + | ENSG00000026025 | VIM   |
| 2  | 216250354 | 216251240 | - | ENSG00000115414 | FN1   |
| 2  | 216276303 | 216276803 | - | ENSG00000115414 | FN1   |
| 2  | 216289932 | 216291190 | - | ENSG00000115414 | FN1   |
| 2  | 216291471 | 216291940 | - | ENSG00000115414 | FN1   |
| 2  | 216300198 | 216300946 | - | ENSG00000115414 | FN1   |
| 8  | 49835794  | 49836343  | - | ENSG00000019549 | SNAI2 |
| 8  | 49880992  | 49881640  | - | ENSG00000019549 | SNAI2 |
| 8  | 49889581  | 49890269  | - | ENSG00000019549 | SNAI2 |
| 1  | 218541048 | 218541884 | + | ENSG00000092969 | TGFB2 |
| 1  | 218551228 | 218552131 | + | ENSG00000092969 | TGFB2 |
| 1  | 218568619 | 218569323 | + | ENSG00000092969 | TGFB2 |
| 1  | 218586285 | 218586829 | + | ENSG00000092969 | TGFB2 |
| 1  | 218600533 | 218602516 | + | ENSG00000092969 | TGFB2 |
| 1  | 218628539 | 218629602 | + | ENSG00000092969 | TGFB2 |
| 4  | 108977908 | 108978404 | - | ENSG00000138795 | LEF1  |
| 4  | 108978982 | 108979370 | - | ENSG00000138795 | LEF1  |
| 4  | 108998099 | 108999116 | - | ENSG00000138795 | LEF1  |
| 4  | 109001926 | 109002908 | - | ENSG00000138795 | LEF1  |
| 4  | 109045040 | 109045877 | - | ENSG00000138795 | LEF1  |
| 4  | 109053708 | 109054406 | - | ENSG00000138795 | LEF1  |
| 4  | 109087613 | 109090536 | - | ENSG00000138795 | LEF1  |

|    |           |           |   |                 |        |
|----|-----------|-----------|---|-----------------|--------|
| 5  | 52284656  | 52285880  | + | ENSG00000164171 | ITGA2  |
| 10 | 31619909  | 31620397  | + | ENSG00000148516 | ZEB1   |
| 10 | 31628289  | 31628797  | + | ENSG00000148516 | ZEB1   |
| 10 | 31694566  | 31695307  | + | ENSG00000148516 | ZEB1   |
| 10 | 31695899  | 31697118  | + | ENSG00000148516 | ZEB1   |
| 10 | 31730493  | 31731220  | + | ENSG00000148516 | ZEB1   |
| 10 | 31732421  | 31733742  | + | ENSG00000148516 | ZEB1   |
| 10 | 31737435  | 31738398  | + | ENSG00000148516 | ZEB1   |
| 10 | 31796881  | 31797956  | + | ENSG00000148516 | ZEB1   |
| 10 | 31828312  | 31828727  | + | ENSG00000148516 | ZEB1   |
| 17 | 45320806  | 45322021  | + | ENSG00000056345 | ITGB3  |
| 17 | 45327484  | 45328259  | + | ENSG00000056345 | ITGB3  |
| 17 | 45330706  | 45333349  | + | ENSG00000056345 | ITGB3  |
| 17 | 45352577  | 45353465  | + | ENSG00000056345 | ITGB3  |
| 17 | 45357550  | 45358415  | + | ENSG00000056345 | ITGB3  |
| 17 | 45369368  | 45370040  | + | ENSG00000056345 | ITGB3  |
| 17 | 45376182  | 45377219  | + | ENSG00000056345 | ITGB3  |
| 17 | 45390242  | 45391095  | + | ENSG00000056345 | ITGB3  |
| 17 | 45391127  | 45391768  | + | ENSG00000056345 | ITGB3  |
| 13 | 102104875 | 102105369 | + | ENSG00000198542 | ITGBL1 |
| 13 | 102105808 | 102106847 | + | ENSG00000198542 | ITGBL1 |
| 13 | 102121617 | 102122072 | + | ENSG00000198542 | ITGBL1 |
| 13 | 102184013 | 102184449 | + | ENSG00000198542 | ITGBL1 |
| 13 | 102191242 | 102193168 | + | ENSG00000198542 | ITGBL1 |
| 13 | 102208540 | 102208995 | + | ENSG00000198542 | ITGBL1 |
| 13 | 102330723 | 102331675 | + | ENSG00000198542 | ITGBL1 |
| 13 | 102333868 | 102334395 | + | ENSG00000198542 | ITGBL1 |
| 13 | 102361268 | 102361836 | + | ENSG00000198542 | ITGBL1 |
| 22 | 37621548  | 37624023  | - | ENSG00000128340 | RAC2   |
| 22 | 37624414  | 37626185  | - | ENSG00000128340 | RAC2   |
| 22 | 37626978  | 37628247  | - | ENSG00000128340 | RAC2   |
| 22 | 37629185  | 37630949  | - | ENSG00000128340 | RAC2   |
| 22 | 37631303  | 37631783  | - | ENSG00000128340 | RAC2   |
| 22 | 37632777  | 37634892  | - | ENSG00000128340 | RAC2   |
| 22 | 37636800  | 37638057  | - | ENSG00000128340 | RAC2   |
| 22 | 37638708  | 37639672  | - | ENSG00000128340 | RAC2   |
| 22 | 37639711  | 37641290  | - | ENSG00000128340 | RAC2   |
| 22 | 37643506  | 37644035  | - | ENSG00000128340 | RAC2   |
| 22 | 37646961  | 37647431  | - | ENSG00000128340 | RAC2   |

|    |           |           |   |                 |      |
|----|-----------|-----------|---|-----------------|------|
| 22 | 37649476  | 37650603  | - | ENSG00000128340 | RAC2 |
| 22 | 37651513  | 37652930  | - | ENSG00000128340 | RAC2 |
| 2  | 151278081 | 151278520 | - | ENSG00000115963 | RND3 |
| 2  | 151341645 | 151343563 | - | ENSG00000115963 | RND3 |
| 2  | 151349839 | 151350277 | - | ENSG00000115963 | RND3 |
| 2  | 151357787 | 151358335 | - | ENSG00000115963 | RND3 |
| 2  | 151369097 | 151369739 | - | ENSG00000115963 | RND3 |
| 2  | 151372747 | 151373253 | - | ENSG00000115963 | RND3 |
| 2  | 151386938 | 151387527 | - | ENSG00000115963 | RND3 |
| 2  | 151390320 | 151390802 | - | ENSG00000115963 | RND3 |
| 2  | 151399130 | 151399743 | - | ENSG00000115963 | RND3 |
| 2  | 151399787 | 151400290 | - | ENSG00000115963 | RND3 |
| 15 | 63309435  | 63310044  | + | ENSG00000140416 | TPM1 |
| 15 | 63325084  | 63325678  | + | ENSG00000140416 | TPM1 |
| 15 | 63333918  | 63336377  | + | ENSG00000140416 | TPM1 |
| 15 | 63340144  | 63341436  | + | ENSG00000140416 | TPM1 |
| 15 | 63345735  | 63346259  | + | ENSG00000140416 | TPM1 |
| 15 | 63376065  | 63376939  | + | ENSG00000140416 | TPM1 |
| 15 | 63379337  | 63380213  | + | ENSG00000140416 | TPM1 |
| 20 | 59823031  | 59823842  | + | ENSG00000179242 | CDH4 |
| 20 | 59826752  | 59829928  | + | ENSG00000179242 | CDH4 |
| 20 | 59831471  | 59832061  | + | ENSG00000179242 | CDH4 |
| 20 | 59854615  | 59857168  | + | ENSG00000179242 | CDH4 |
| 20 | 59857426  | 59859217  | + | ENSG00000179242 | CDH4 |
| 20 | 59862223  | 59863039  | + | ENSG00000179242 | CDH4 |
| 20 | 59863276  | 59864817  | + | ENSG00000179242 | CDH4 |
| 20 | 59867282  | 59870225  | + | ENSG00000179242 | CDH4 |
| 20 | 60318398  | 60320287  | + | ENSG00000179242 | CDH4 |
| 20 | 60320566  | 60322646  | + | ENSG00000179242 | CDH4 |
| 20 | 60338989  | 60343417  | + | ENSG00000179242 | CDH4 |
| 20 | 60345057  | 60346661  | + | ENSG00000179242 | CDH4 |
| 20 | 60347849  | 60348848  | + | ENSG00000179242 | CDH4 |
| 20 | 60359531  | 60360980  | + | ENSG00000179242 | CDH4 |
| 20 | 60364244  | 60366220  | + | ENSG00000179242 | CDH4 |
| 20 | 60366547  | 60369235  | + | ENSG00000179242 | CDH4 |
| 20 | 60370707  | 60371828  | + | ENSG00000179242 | CDH4 |
| 20 | 60371850  | 60374148  | + | ENSG00000179242 | CDH4 |
| 20 | 60374406  | 60377225  | + | ENSG00000179242 | CDH4 |
| 20 | 60377464  | 60379886  | + | ENSG00000179242 | CDH4 |

|    |          |          |   |                 |      |
|----|----------|----------|---|-----------------|------|
| 20 | 60380236 | 60383421 | + | ENSG00000179242 | CDH4 |
| 20 | 60383569 | 60384557 | + | ENSG00000179242 | CDH4 |
| 20 | 60384612 | 60386312 | + | ENSG00000179242 | CDH4 |
| 20 | 60386528 | 60387633 | + | ENSG00000179242 | CDH4 |
| 20 | 60387667 | 60390691 | + | ENSG00000179242 | CDH4 |
| 20 | 60391509 | 60392046 | + | ENSG00000179242 | CDH4 |
| 20 | 60392146 | 60393315 | + | ENSG00000179242 | CDH4 |
| 20 | 60393494 | 60394819 | + | ENSG00000179242 | CDH4 |
| 20 | 60394884 | 60396750 | + | ENSG00000179242 | CDH4 |
| 20 | 60403717 | 60406308 | + | ENSG00000179242 | CDH4 |
| 20 | 60408994 | 60410220 | + | ENSG00000179242 | CDH4 |
| 20 | 60410257 | 60411320 | + | ENSG00000179242 | CDH4 |
| 20 | 60411930 | 60413795 | + | ENSG00000179242 | CDH4 |
| 20 | 60419594 | 60423976 | + | ENSG00000179242 | CDH4 |
| 20 | 60424237 | 60425318 | + | ENSG00000179242 | CDH4 |
| 20 | 60425579 | 60429039 | + | ENSG00000179242 | CDH4 |
| 20 | 60429048 | 60431247 | + | ENSG00000179242 | CDH4 |
| 20 | 60434695 | 60435266 | + | ENSG00000179242 | CDH4 |
| 20 | 60435456 | 60437813 | + | ENSG00000179242 | CDH4 |
| 20 | 60438163 | 60440489 | + | ENSG00000179242 | CDH4 |
| 20 | 60442888 | 60445884 | + | ENSG00000179242 | CDH4 |
| 20 | 60446981 | 60451872 | + | ENSG00000179242 | CDH4 |
| 20 | 60451918 | 60455136 | + | ENSG00000179242 | CDH4 |
| 20 | 60455165 | 60460578 | + | ENSG00000179242 | CDH4 |
| 20 | 60460596 | 60462406 | + | ENSG00000179242 | CDH4 |
| 20 | 60462775 | 60467065 | + | ENSG00000179242 | CDH4 |
| 20 | 60467513 | 60469287 | + | ENSG00000179242 | CDH4 |
| 20 | 60469644 | 60472112 | + | ENSG00000179242 | CDH4 |
| 20 | 60472209 | 60476157 | + | ENSG00000179242 | CDH4 |
| 20 | 60476195 | 60477758 | + | ENSG00000179242 | CDH4 |
| 20 | 60478568 | 60480227 | + | ENSG00000179242 | CDH4 |
| 20 | 60480370 | 60480825 | + | ENSG00000179242 | CDH4 |
| 20 | 60480892 | 60483282 | + | ENSG00000179242 | CDH4 |
| 20 | 60483314 | 60484792 | + | ENSG00000179242 | CDH4 |
| 20 | 60484869 | 60486039 | + | ENSG00000179242 | CDH4 |
| 20 | 60487821 | 60489420 | + | ENSG00000179242 | CDH4 |
| 20 | 60489754 | 60490894 | + | ENSG00000179242 | CDH4 |
| 20 | 60497491 | 60503886 | + | ENSG00000179242 | CDH4 |
| 20 | 60504280 | 60510622 | + | ENSG00000179242 | CDH4 |



|    |           |           |   |                 |        |
|----|-----------|-----------|---|-----------------|--------|
| 20 | 60510661  | 60512351  | + | ENSG00000179242 | CDH4   |
| 20 | 60512552  | 60514751  | + | ENSG00000179242 | CDH4   |
| 2  | 173248534 | 173249024 | + | ENSG00000091409 | ITGA6  |
| 2  | 173282086 | 173282689 | + | ENSG00000091409 | ITGA6  |
| 2  | 173288260 | 173288735 | + | ENSG00000091409 | ITGA6  |
| 2  | 173291898 | 173293161 | + | ENSG00000091409 | ITGA6  |
| 5  | 140568055 | 140569190 | + | ENSG00000177839 | PCDHB9 |
| 9  | 101866553 | 101868409 | + | ENSG00000106799 | TGFBR1 |
| 9  | 101921480 | 101922177 | + | ENSG00000106799 | TGFBR1 |
| 9  | 101923985 | 101924597 | + | ENSG00000106799 | TGFBR1 |
| 1  | 156029632 | 156031210 | + | ENSG00000132698 | RAB25  |
| 1  | 156035595 | 156036227 | + | ENSG00000132698 | RAB25  |
| 1  | 156036288 | 156037009 | + | ENSG00000132698 | RAB25  |
| 1  | 156037319 | 156039431 | + | ENSG00000132698 | RAB25  |
| 1  | 156039558 | 156041079 | + | ENSG00000132698 | RAB25  |
| 17 | 7163994   | 7166613   | - | ENSG00000181885 | CLDN7  |
| 17 | 7166712   | 7167376   | - | ENSG00000181885 | CLDN7  |
| 16 | 68757400  | 68758228  | + | ENSG00000039068 | CDH1   |
| 16 | 68759099  | 68759837  | + | ENSG00000039068 | CDH1   |
| 16 | 68761789  | 68762608  | + | ENSG00000039068 | CDH1   |
| 16 | 68763352  | 68764449  | + | ENSG00000039068 | CDH1   |
| 16 | 68769167  | 68772534  | + | ENSG00000039068 | CDH1   |
| 16 | 68811246  | 68812334  | + | ENSG00000039068 | CDH1   |
| 16 | 68821275  | 68822112  | + | ENSG00000039068 | CDH1   |
| 16 | 68828377  | 68828990  | + | ENSG00000039068 | CDH1   |
| 16 | 68829110  | 68830152  | + | ENSG00000039068 | CDH1   |
| 16 | 68838640  | 68840457  | + | ENSG00000039068 | CDH1   |
| 16 | 68847351  | 68848424  | + | ENSG00000039068 | CDH1   |
| 16 | 68852138  | 68853193  | + | ENSG00000039068 | CDH1   |
| 16 | 68857741  | 68858359  | + | ENSG00000039068 | CDH1   |
| 16 | 68870690  | 68871962  | + | ENSG00000039068 | CDH1   |
| 9  | 35682527  | 35683372  | - | ENSG00000198467 | TPM2   |
| 9  | 35684500  | 35685649  | - | ENSG00000198467 | TPM2   |
| 9  | 35689139  | 35691700  | - | ENSG00000198467 | TPM2   |
| 9  | 35692696  | 35693749  | - | ENSG00000198467 | TPM2   |
| 17 | 79989492  | 79992990  | + | ENSG00000169750 | RAC3   |
| 19 | 3717741   | 3718343   | + | ENSG00000105289 | TJP3   |
| 19 | 3720647   | 3721396   | + | ENSG00000105289 | TJP3   |
| 19 | 3721398   | 3722269   | + | ENSG00000105289 | TJP3   |

|    |          |          |   |                 |      |
|----|----------|----------|---|-----------------|------|
| 19 | 3724064  | 3724847  | + | ENSG00000105289 | TJP3 |
| 19 | 3727657  | 3729180  | + | ENSG00000105289 | TJP3 |
| 19 | 3729312  | 3731188  | + | ENSG00000105289 | TJP3 |
| 19 | 3732526  | 3733418  | + | ENSG00000105289 | TJP3 |
| 19 | 3733751  | 3735498  | + | ENSG00000105289 | TJP3 |
| 19 | 3735838  | 3737244  | + | ENSG00000105289 | TJP3 |
| 19 | 3738325  | 3739585  | + | ENSG00000105289 | TJP3 |
| 19 | 3741008  | 3741827  | + | ENSG00000105289 | TJP3 |
| 19 | 3742478  | 3743240  | + | ENSG00000105289 | TJP3 |
| 19 | 3744275  | 3745462  | + | ENSG00000105289 | TJP3 |
| 19 | 3746076  | 3748545  | + | ENSG00000105289 | TJP3 |
| 19 | 3750537  | 3755032  | + | ENSG00000105289 | TJP3 |
| 7  | 55047639 | 55048090 | + | ENSG00000146648 | EGFR |
| 7  | 55071433 | 55073479 | + | ENSG00000146648 | EGFR |
| 7  | 55086020 | 55088310 | + | ENSG00000146648 | EGFR |
| 7  | 55123241 | 55123682 | + | ENSG00000146648 | EGFR |
| 7  | 55145508 | 55147231 | + | ENSG00000146648 | EGFR |
| 7  | 55163191 | 55163806 | + | ENSG00000146648 | EGFR |
| 7  | 55189887 | 55190448 | + | ENSG00000146648 | EGFR |
| 7  | 55198346 | 55198822 | + | ENSG00000146648 | EGFR |
| 7  | 55201158 | 55202229 | + | ENSG00000146648 | EGFR |
| 7  | 55211997 | 55213112 | + | ENSG00000146648 | EGFR |
| 7  | 55219028 | 55219762 | + | ENSG00000146648 | EGFR |
| 7  | 55220726 | 55221155 | + | ENSG00000146648 | EGFR |
| 7  | 55221543 | 55222285 | + | ENSG00000146648 | EGFR |
| 7  | 55228582 | 55229392 | + | ENSG00000146648 | EGFR |
| 7  | 55234129 | 55235562 | + | ENSG00000146648 | EGFR |
| 7  | 55236691 | 55237133 | + | ENSG00000146648 | EGFR |
| 7  | 55245005 | 55246565 | + | ENSG00000146648 | EGFR |
| 7  | 55259820 | 55260450 | + | ENSG00000146648 | EGFR |
| 7  | 55270639 | 55271618 | + | ENSG00000146648 | EGFR |
| 7  | 55271739 | 55273106 | + | ENSG00000146648 | EGFR |
| 7  | 55287001 | 55289015 | + | ENSG00000146648 | EGFR |
| 7  | 55290850 | 55291591 | + | ENSG00000146648 | EGFR |
| 7  | 55318364 | 55318910 | + | ENSG00000146648 | EGFR |
| 7  | 55321971 | 55323179 | + | ENSG00000146648 | EGFR |
| 7  | 55325216 | 55325889 | + | ENSG00000146648 | EGFR |
| 8  | 28351140 | 28352474 | + | ENSG00000104290 | FZD3 |
| 8  | 28358172 | 28358624 | + | ENSG00000104290 | FZD3 |

|    |          |          |   |                 |       |
|----|----------|----------|---|-----------------|-------|
| 8  | 28400745 | 28401309 | + | ENSG00000104290 | FZD3  |
| 8  | 28405277 | 28405766 | + | ENSG00000104290 | FZD3  |
| 8  | 28418454 | 28418874 | + | ENSG00000104290 | FZD3  |
| 1  | 59242032 | 59242625 | - | ENSG00000177606 | JUN   |
| 1  | 59247591 | 59251299 | - | ENSG00000177606 | JUN   |
| 5  | 68788039 | 68790332 | + | ENSG00000197822 | OCLN  |
| 5  | 68803812 | 68804585 | + | ENSG00000197822 | OCLN  |
| 5  | 68810501 | 68812531 | + | ENSG00000197822 | OCLN  |
| 5  | 68812939 | 68813458 | + | ENSG00000197822 | OCLN  |
| 5  | 68829365 | 68829844 | + | ENSG00000197822 | OCLN  |
| 5  | 68832094 | 68833204 | + | ENSG00000197822 | OCLN  |
| 5  | 68844010 | 68844794 | + | ENSG00000197822 | OCLN  |
| 5  | 68847722 | 68848463 | + | ENSG00000197822 | OCLN  |
| 5  | 68850668 | 68851406 | + | ENSG00000197822 | OCLN  |
| 22 | 39594848 | 39595349 | - | ENSG00000100311 | PDGFB |
| 22 | 39596317 | 39597020 | - | ENSG00000100311 | PDGFB |
| 22 | 39600659 | 39601842 | - | ENSG00000100311 | PDGFB |
| 22 | 39602988 | 39604612 | - | ENSG00000100311 | PDGFB |
| 22 | 39605505 | 39606985 | - | ENSG00000100311 | PDGFB |
| 22 | 39609142 | 39609900 | - | ENSG00000100311 | PDGFB |
| 22 | 39615898 | 39616989 | - | ENSG00000100311 | PDGFB |
| 22 | 39619070 | 39619731 | - | ENSG00000100311 | PDGFB |
| 22 | 39620393 | 39621094 | - | ENSG00000100311 | PDGFB |
| 22 | 39621379 | 39622188 | - | ENSG00000100311 | PDGFB |
| 22 | 39622646 | 39623516 | - | ENSG00000100311 | PDGFB |
| 22 | 39625971 | 39627127 | - | ENSG00000100311 | PDGFB |
| 22 | 39627269 | 39628192 | - | ENSG00000100311 | PDGFB |
| 22 | 39629335 | 39629979 | - | ENSG00000100311 | PDGFB |
| 22 | 39631026 | 39632094 | - | ENSG00000100311 | PDGFB |
| 22 | 39633554 | 39634410 | - | ENSG00000100311 | PDGFB |
| 22 | 39636973 | 39642244 | - | ENSG00000100311 | PDGFB |
| 22 | 39645643 | 39646742 | - | ENSG00000100311 | PDGFB |
| 22 | 39648764 | 39649292 | - | ENSG00000100311 | PDGFB |
| 22 | 39649354 | 39651455 | - | ENSG00000100311 | PDGFB |
| 22 | 39651990 | 39654451 | - | ENSG00000100311 | PDGFB |
| 22 | 39654638 | 39655737 | - | ENSG00000100311 | PDGFB |
| 22 | 39656395 | 39657251 | - | ENSG00000100311 | PDGFB |
| 22 | 39658149 | 39658879 | - | ENSG00000100311 | PDGFB |
| 22 | 39659967 | 39660963 | - | ENSG00000100311 | PDGFB |

|    |           |           |   |                 |          |
|----|-----------|-----------|---|-----------------|----------|
| 22 | 39661258  | 39662312  | - | ENSG00000100311 | PDGFB    |
| 22 | 39663034  | 39663721  | - | ENSG00000100311 | PDGFB    |
| 7  | 100753566 | 100754201 | + | ENSG00000106366 | SERPINE1 |
| 7  | 100757870 | 100758882 | + | ENSG00000106366 | SERPINE1 |
| 7  | 100760328 | 100761451 | + | ENSG00000106366 | SERPINE1 |
| 7  | 100765313 | 100765878 | + | ENSG00000106366 | SERPINE1 |
| 7  | 100768299 | 100768843 | + | ENSG00000106366 | SERPINE1 |
| 7  | 100779045 | 100779643 | + | ENSG00000106366 | SERPINE1 |
| 7  | 100785682 | 100786435 | + | ENSG00000106366 | SERPINE1 |
| 12 | 49359736  | 49360430  | - | ENSG00000169884 | WNT10B   |
| 12 | 49360648  | 49361505  | - | ENSG00000169884 | WNT10B   |
| 12 | 49361683  | 49362161  | - | ENSG00000169884 | WNT10B   |
| 12 | 49363500  | 49364708  | - | ENSG00000169884 | WNT10B   |
| 12 | 49365192  | 49366224  | - | ENSG00000169884 | WNT10B   |
| 12 | 49366228  | 49366869  | - | ENSG00000169884 | WNT10B   |
| 7  | 120968721 | 120969948 | + | ENSG00000002745 | WNT16    |
| 3  | 55504013  | 55504634  | - | ENSG00000114251 | WNT5A    |
| 3  | 55507986  | 55508964  | - | ENSG00000114251 | WNT5A    |
| 3  | 55516480  | 55517392  | - | ENSG00000114251 | WNT5A    |
| 3  | 55518269  | 55518844  | - | ENSG00000114251 | WNT5A    |
| 3  | 55520094  | 55522160  | - | ENSG00000114251 | WNT5A    |
| 3  | 55522369  | 55523836  | - | ENSG00000114251 | WNT5A    |

**Table S3. AP-1 consensus motifs identified in FRA1<sup>EMT</sup> genes.**

| Sequence name | Start | Stop | Score   | P-value  | Matched sequence |
|---------------|-------|------|---------|----------|------------------|
| CD109         | 599   | 590  | 16.7038 | 9.09E-07 | ATGAGTCACC       |
| EPCAM         | 926   | 917  | 16.7038 | 9.09E-07 | ATGAGTCACC       |
| LEF1          | 764   | 773  | 16.7038 | 9.09E-07 | ATGAGTCACC       |
| FZD3          | 433   | 442  | 16.7038 | 9.09E-07 | ATGAGTCACC       |
| CLDN4         | 886   | 895  | 15.5695 | 2.56E-06 | CTGAGTCACC       |
| BMP7          | 894   | 885  | 15.5695 | 2.56E-06 | CTGAGTCACC       |
| SMAD3         | 195   | 204  | 15.5695 | 2.56E-06 | CTGAGTCACC       |
| ITGA3         | 135   | 144  | 15.5695 | 2.56E-06 | CTGAGTCACC       |
| RAC2          | 1373  | 1382 | 15.5695 | 2.56E-06 | CTGAGTCACC       |
| SERPINE1      | 437   | 428  | 15.5695 | 2.56E-06 | CTGAGTCACC       |
| CLDN4         | 815   | 824  | 15.4277 | 4.42E-06 | GTGAGTCACC       |
| BMP4          | 572   | 581  | 15.4277 | 4.42E-06 | GTGAGTCACC       |
| BMP7          | 840   | 831  | 15.4277 | 4.42E-06 | GTGAGTCACC       |
| AXL           | 647   | 638  | 15.4277 | 4.42E-06 | GTGAGTCACC       |
| TJP2          | 462   | 453  | 15.4277 | 4.42E-06 | GTGAGTCACC       |
| STAT3         | 679   | 670  | 15.4277 | 4.42E-06 | GTGAGTCACC       |
| VIM           | 511   | 520  | 15.4277 | 4.42E-06 | GTGAGTCACC       |
| PDGFB         | 838   | 829  | 15.4277 | 4.42E-06 | GTGAGTCACC       |
| CLDN4         | 970   | 961  | 15.1441 | 6.07E-06 | ATGAGTCAGC       |
| AXL           | 217   | 208  | 15.1441 | 6.07E-06 | CTGACTCACC       |
| AXL           | 440   | 449  | 15.1441 | 6.07E-06 | ATGAGTCAGC       |
| ZEB1          | 495   | 486  | 15.1441 | 6.07E-06 | CTGACTCACC       |
| WNT10B        | 192   | 201  | 15.1441 | 6.07E-06 | CTGACTCACC       |
| BMP4          | 580   | 571  | 15.0023 | 7.92E-06 | GTGACTCACC       |
| BMP7          | 2508  | 2517 | 15.0023 | 7.92E-06 | GTGACTCACC       |
| LAMC2         | 440   | 431  | 15.0023 | 7.92E-06 | GTGACTCACC       |
| PLAUR         | 50    | 59   | 15.0023 | 7.92E-06 | GTGACTCACC       |
| VIM           | 519   | 510  | 15.0023 | 7.92E-06 | GTGACTCACC       |
| TJP3          | 310   | 319  | 15.0023 | 7.92E-06 | GTGACTCACC       |
| TNC           | 619   | 610  | 14.7188 | 9.94E-06 | ATGACTCAGC       |
| EGFR          | 258   | 249  | 14.4352 | 1.22E-05 | ATGACTCACA       |
| PDGFB         | 1152  | 1143 | 14.4352 | 1.22E-05 | ATGAGTCACT       |
| LAMB3         | 1329  | 1320 | 14.0098 | 1.58E-05 | CTGAGTCAGC       |
| STAT5B        | 1496  | 1505 | 14.0098 | 1.58E-05 | ATGACTCACT       |
| ITGAV         | 70    | 79   | 14.0098 | 1.58E-05 | ATGACTCACT       |

|        |      |      |         |          |            |
|--------|------|------|---------|----------|------------|
| MMP14  | 48   | 57   | 14.0098 | 1.58E-05 | CTGAGTCAGC |
| MMP16  | 273  | 282  | 14.0098 | 1.58E-05 | CTGAGTCAGC |
| LAMB3  | 1247 | 1238 | 13.8681 | 1.75E-05 | GTGAGTCAGC |
| ITGA3  | 1170 | 1179 | 13.8681 | 1.75E-05 | CTGACTCATC |
| CDH1   | 876  | 867  | 13.8681 | 1.75E-05 | GTGAGTCAGC |
| EPCAM  | 918  | 927  | 13.7263 | 1.93E-05 | GTGACTCATC |
| RAC2   | 477  | 486  | 13.7263 | 1.93E-05 | CTGAGTCACA |
| LAMC2  | 432  | 441  | 13.5845 | 2.23E-05 | GTGAGTCACA |
| STAT5B | 555  | 546  | 13.5845 | 2.23E-05 | CTGACTCAGC |
| ITGA3  | 1071 | 1062 | 13.5845 | 2.23E-05 | CTGACTCAGC |
| MMP14  | 56   | 47   | 13.5845 | 2.23E-05 | CTGACTCAGC |
| TJP3   | 1150 | 1159 | 13.5845 | 2.23E-05 | CTGACTCAGC |
| OCLN   | 241  | 250  | 13.5845 | 2.23E-05 | CTGACTCAGC |
| PDGFB  | 818  | 827  | 13.5845 | 2.23E-05 | GTGAGTCACA |
| PDGFB  | 194  | 203  | 13.5845 | 2.23E-05 | CTGACTCAGC |
| SMAD3  | 203  | 194  | 13.4427 | 2.30E-05 | GTGACTCAGC |
| ITGA3  | 143  | 134  | 13.4427 | 2.30E-05 | GTGACTCAGC |
| CLDN4  | 107  | 98   | 13.3009 | 2.60E-05 | CTGAGTCACT |
| BMP7   | 637  | 628  | 13.3009 | 2.60E-05 | CTGAGTCACT |
| AXL    | 392  | 383  | 13.3009 | 2.60E-05 | CTGAGTCACT |
| FBN1   | 91   | 100  | 13.3009 | 2.60E-05 | ATGAGTCAGA |
| LAMB3  | 1239 | 1248 | 13.3009 | 2.60E-05 | CTGACTCACA |
| ITGA3  | 1178 | 1169 | 13.3009 | 2.60E-05 | ATGAGTCAGA |
| EGFR   | 81   | 90   | 13.3009 | 2.60E-05 | CTGACTCACA |
| CLDN4  | 911  | 902  | 13.1591 | 3.05E-05 | GTGAGTCACT |
| CLDN4  | 903  | 912  | 13.1591 | 3.05E-05 | GTGACTCACA |
| BMP7   | 2516 | 2507 | 13.1591 | 3.05E-05 | GTGAGTCACT |
| BMP7   | 832  | 841  | 13.1591 | 3.05E-05 | GTGACTCACA |
| AXL    | 158  | 149  | 13.1591 | 3.05E-05 | GTGACTCACA |
| TGFBR2 | 317  | 326  | 13.1591 | 3.05E-05 | GTGAGTCACT |
| STAT5B | 396  | 387  | 13.1591 | 3.05E-05 | GTGACTCACA |
| STAT5B | 388  | 397  | 13.1591 | 3.05E-05 | GTGAGTCACT |
| STAT3  | 671  | 680  | 13.1591 | 3.05E-05 | GTGACTCACA |
| ROBO1  | 723  | 732  | 13.1591 | 3.05E-05 | GTGAGTCACT |
| ROBO1  | 418  | 427  | 13.1591 | 3.05E-05 | GTGAGTCACT |
| TJP3   | 318  | 309  | 13.1591 | 3.05E-05 | GTGAGTCACT |
| TJP3   | 1131 | 1122 | 13.1591 | 3.05E-05 | GTGAGTCACT |
| TJP3   | 1123 | 1132 | 13.1591 | 3.05E-05 | GTGACTCACA |
| PDGFB  | 826  | 817  | 13.1591 | 3.05E-05 | GTGACTCACA |

|          |      |      |         |          |            |
|----------|------|------|---------|----------|------------|
| PDGFB    | 830  | 839  | 13.1591 | 3.05E-05 | GTGACTCACA |
| CD109    | 335  | 326  | 12.8756 | 3.47E-05 | CTGACTCACT |
| TGFBR2   | 29   | 38   | 12.8756 | 3.47E-05 | ATGAGTCAGT |
| CDH1     | 868  | 877  | 12.8756 | 3.47E-05 | CTGACTCACT |
| PDGFB    | 55   | 46   | 12.8756 | 3.47E-05 | CTGACTCACT |
| CLDN4    | 823  | 814  | 12.7338 | 3.70E-05 | GTGACTCACT |
| TGFBR2   | 325  | 316  | 12.7338 | 3.70E-05 | GTGACTCACT |
| BMP4     | 414  | 423  | 12.592  | 3.79E-05 | TTGAGTCACC |
| CDH1     | 35   | 26   | 12.4502 | 4.01E-05 | ATGACTCAGT |
| TJP3     | 1256 | 1247 | 12.4502 | 4.01E-05 | ATGACTCAGT |
| BMP7     | 572  | 563  | 12.1666 | 4.30E-05 | CTGAGTCAGA |
| AXL      | 357  | 348  | 12.1666 | 4.30E-05 | CTGAGTCAGA |
| LAMB3    | 1851 | 1860 | 12.1666 | 4.30E-05 | CTGAGTCAGA |
| STAT5B   | 547  | 556  | 12.1666 | 4.30E-05 | CTGAGTCAGA |
| PDGFB    | 1121 | 1112 | 12.1666 | 4.30E-05 | CTGAGTCAGA |
| SERPINE1 | 163  | 172  | 12.1666 | 4.30E-05 | CTGAGTCAGA |
| LAMB3    | 116  | 125  | 12.0249 | 4.70E-05 | ATGAGTCACG |
| SNAI2    | 356  | 365  | 12.0249 | 4.70E-05 | GTGAGTCAGA |
| CDH1     | 27   | 36   | 12.0249 | 4.70E-05 | CTGAGTCATT |
| PDGFB    | 47   | 56   | 12.0249 | 4.70E-05 | GTGAGTCAGA |
| EGFR     | 250  | 259  | 11.8831 | 4.92E-05 | GTGAGTCATT |
| BMP7     | 564  | 573  | 11.7413 | 5.20E-05 | CTGACTCAGA |
| SMAD3    | 914  | 923  | 11.7413 | 5.20E-05 | CTGACTCAGA |
| NRP1     | 255  | 264  | 11.7413 | 5.20E-05 | CTGAATCACC |
| PDGFB    | 202  | 193  | 11.7413 | 5.20E-05 | CTGAGTCAGT |
| CLDN4    | 414  | 405  | 11.5995 | 5.81E-05 | GTGAATCACC |
| CLDN4    | 894  | 885  | 11.5995 | 5.81E-05 | GTGACTCAGA |
| CD109    | 610  | 601  | 11.5995 | 5.81E-05 | ATGAATCATC |
| BMP7     | 886  | 895  | 11.5995 | 5.81E-05 | GTGACTCAGA |
| TGFBR2   | 37   | 28   | 11.5995 | 5.81E-05 | CTGACTCATT |
| ETS1     | 240  | 249  | 11.5995 | 5.81E-05 | GTGAATCACC |
| STAT5B   | 222  | 231  | 11.5995 | 5.81E-05 | GTGAATCACC |
| LAMB1    | 312  | 321  | 11.5995 | 5.81E-05 | GTGAATCACC |
| TJP2     | 497  | 506  | 11.5995 | 5.81E-05 | GTGAATCACC |
| ZEB1     | 487  | 496  | 11.5995 | 5.81E-05 | GTGAGTCAGT |
| RAC2     | 485  | 476  | 11.5995 | 5.81E-05 | GTGACTCAGA |
| RAC2     | 1381 | 1372 | 11.5995 | 5.81E-05 | GTGACTCAGA |
| TJP3     | 1611 | 1602 | 11.5995 | 5.81E-05 | GTGAATCACC |
| EGFR     | 89   | 80   | 11.5995 | 5.81E-05 | GTGAGTCAGT |

|          |      |      |         |          |            |
|----------|------|------|---------|----------|------------|
| SERPINE1 | 429  | 438  | 11.5995 | 5.81E-05 | GTGACTCAGA |
| LAMB3    | 124  | 115  | 11.4577 | 5.92E-05 | GTGACTCATT |
| CD109    | 122  | 113  | 11.3159 | 6.23E-05 | ATGAATCAGC |
| LAMC2    | 481  | 472  | 11.3159 | 6.23E-05 | CTGACTCAGT |
| LAMB3    | 1859 | 1850 | 11.3159 | 6.23E-05 | CTGACTCAGT |
| LAMB3    | 1321 | 1330 | 11.3159 | 6.23E-05 | CTGACTCAGT |
| PLAUR    | 625  | 634  | 11.3159 | 6.23E-05 | CTGACTCAGT |
| STAT5B   | 144  | 135  | 11.3159 | 6.23E-05 | CTGACTCAGT |
| PDGFB    | 744  | 753  | 11.3159 | 6.23E-05 | CTGACTCAGT |
| SERPINE1 | 171  | 162  | 11.3159 | 6.23E-05 | CTGACTCAGT |
| AXL      | 277  | 268  | 11.0324 | 6.66E-05 | ATGAATCACA |
| ROBO1    | 386  | 377  | 11.0324 | 6.66E-05 | ATGAATCACA |
| AXL      | 150  | 159  | 10.7488 | 7.36E-05 | GTGAGTCACG |
| LAMB3    | 162  | 153  | 10.7488 | 7.36E-05 | ATTACTCACC |
| PLAUR    | 58   | 49   | 10.7488 | 7.36E-05 | GTGAGTCACG |
| PDGFB    | 282  | 291  | 10.7488 | 7.36E-05 | ATGAGTCATG |
| PDGFB    | 40   | 49   | 10.7488 | 7.36E-05 | GTGAGTCACG |
| ROBO1    | 72   | 63   | 10.607  | 7.58E-05 | ATGAATCACT |
| ROBO1    | 444  | 453  | 10.607  | 7.58E-05 | ATGAATCACT |
| CLDN4    | 342  | 351  | 10.4652 | 7.97E-05 | CTGACTCACG |
| PLAUR    | 1854 | 1845 | 10.4652 | 7.97E-05 | ATGAGTCAGG |
| ITGA5    | 973  | 982  | 10.4652 | 7.97E-05 | ATGACTCAAC |
| SNAI2    | 364  | 355  | 10.4652 | 7.97E-05 | CTGACTCACG |
| AXL      | 639  | 648  | 10.3234 | 8.49E-05 | GTGACTCACG |
| TJP2     | 454  | 463  | 10.3234 | 8.49E-05 | GTGACTCACG |
| TJP2     | 341  | 332  | 10.3234 | 8.49E-05 | GTGAATCATC |
| ROBO1    | 731  | 722  | 10.3234 | 8.49E-05 | GTGACTCACG |
| ROBO1    | 426  | 417  | 10.3234 | 8.49E-05 | GTGACTCACG |
| ITGB3    | 461  | 452  | 10.3234 | 8.49E-05 | ATGACTCATG |
| PDGFB    | 290  | 281  | 10.3234 | 8.49E-05 | ATGACTCATG |
| PDGFB    | 48   | 39   | 10.3234 | 8.49E-05 | GTGACTCACG |
| VIM      | 533  | 524  | 10.0399 | 8.85E-05 | CTTAGTCACC |
| OCLN     | 1071 | 1080 | 10.0399 | 8.85E-05 | CTTAGTCACC |
| CLDN4    | 26   | 17   | 9.89808 | 9.30E-05 | CTGAATCACA |
| PLAU     | 658  | 667  | 9.89808 | 9.30E-05 | TTGACTCACT |
| ITGAV    | 414  | 423  | 9.89808 | 9.30E-05 | CTGAATCACA |
| NRP1     | 226  | 235  | 9.89808 | 9.30E-05 | TTGACTCACT |
| NRP1     | 360  | 351  | 9.89808 | 9.30E-05 | TTGACTCACT |
| ITGBL1   | 138  | 147  | 9.89808 | 9.30E-05 | TTGACTCACT |



|        |      |      |         |          |            |
|--------|------|------|---------|----------|------------|
| TGFBR2 | 4    | 13   | 9.7563  | 9.66E-05 | ATGAATCATA |
| STAT3  | 57   | 66   | 9.7563  | 9.66E-05 | ATGAATCATA |
| CDH4   | 3633 | 3642 | 14.7188 | 9.94E-06 | ATGACTCAGC |
| CDH4   | 3641 | 3632 | 14.2934 | 1.31E-05 | CTGAGTCATC |
| CDH4   | 2613 | 2622 | 14.1516 | 1.40E-05 | GTGAGTCATC |
| CDH4   | 2621 | 2612 | 14.0098 | 1.58E-05 | ATGACTCACT |
| CDH4   | 941  | 932  | 13.8681 | 1.75E-05 | CTGACTCATC |
| CDH4   | 2527 | 2536 | 13.3009 | 2.60E-05 | CTGAGTCACT |
| CDH4   | 933  | 942  | 13.3009 | 2.60E-05 | ATGAGTCAGA |
| CDH4   | 27   | 18   | 12.7338 | 3.70E-05 | ATGACTCATT |
| CDH4   | 393  | 402  | 12.4502 | 4.01E-05 | ATGACTCAGT |
| CDH4   | 819  | 828  | 12.1666 | 4.30E-05 | TTGACTCACC |
| CDH4   | 19   | 28   | 10.7488 | 7.36E-05 | ATGAGTCATG |
| CDH4   | 3693 | 3684 | 10.4652 | 7.97E-05 | CTGAATCATC |
| CDH4   | 441  | 450  | 9.89808 | 9.30E-05 | CTGAATCACA |
| CDH4   | 1501 | 1510 | 9.89808 | 9.30E-05 | CTGAATCACA |
| CDH4   | 2879 | 2870 | 9.7563  | 9.66E-05 | ATGAATCATA |

**Table S4. Mean gene expression levels (log<sub>2</sub>) for the two main groups resulting from unsupervised clustering of stage B and C colorectal cancers using FRA1<sup>EMT</sup> genes. P-values are for t-tests and adjusted for multiple testing using the Benjamini and Hochberg multiple testing correction.**

| Gene name | Affymetrix probe ID | Mean log <sub>2</sub> expression in the right branch | Mean log <sub>2</sub> expression in the left branch | P-value               | Right vs left branch | shFRA1 vs shNS |
|-----------|---------------------|------------------------------------------------------|-----------------------------------------------------|-----------------------|----------------------|----------------|
| VIM       | 1555938_x_at        | 4.8                                                  | 5.3                                                 | 3.26X10 <sup>06</sup> | down                 | down           |
| VIM       | 201426_s_at         | 11.4                                                 | 12.4                                                | 1.08X10 <sup>25</sup> | down                 | down           |
| TGFB1     | 201506_at           | 12.0                                                 | 12.2                                                | 1.89X10 <sup>01</sup> | down                 | down           |
| FN1       | 1558199_at          | 5.6                                                  | 6.1                                                 | 2.31X10 <sup>14</sup> | down                 | down           |
| FN1       | 210495_x_at         | 11.5                                                 | 12.9                                                | 1.26X10 <sup>24</sup> | down                 | down           |
| FN1       | 211719_x_at         | 11.6                                                 | 12.9                                                | 2.64X10 <sup>23</sup> | down                 | down           |
| FN1       | 212464_s_at         | 11.2                                                 | 12.6                                                | 8.71X10 <sup>25</sup> | down                 | down           |
| FN1       | 214701_s_at         | 7.6                                                  | 8.6                                                 | 5.23X10 <sup>14</sup> | down                 | down           |
| FN1       | 214702_at           | 5.0                                                  | 5.5                                                 | 2.38X10 <sup>11</sup> | down                 | down           |
| FN1       | 216442_x_at         | 11.5                                                 | 13.0                                                | 3.52X10 <sup>25</sup> | down                 | down           |
| LPXN      | 216250_s_at         | 8.2                                                  | 8.5                                                 | 1.47X10 <sup>05</sup> | down                 | down           |
| LPXN      | 242778_at           | 5.7                                                  | 5.7                                                 | 8.95X10 <sup>02</sup> | down                 | down           |
| NRP1      | 1561365_at          | 4.0                                                  | 4.1                                                 | 1.16X10 <sup>03</sup> | down                 | down           |
| NRP1      | 210510_s_at         | 6.6                                                  | 6.9                                                 | 6.53X10 <sup>06</sup> | down                 | down           |
| NRP1      | 210615_at           | 5.2                                                  | 5.2                                                 | 4.17X10 <sup>01</sup> | down                 | down           |
| NRP1      | 212298_at           | 7.4                                                  | 8.5                                                 | 2.14X10 <sup>19</sup> | down                 | down           |
| SNAI2     | 213139_at           | 7.4                                                  | 8.6                                                 | 1.45X10 <sup>26</sup> | down                 | down           |
| FBN1      | 202765_s_at         | 7.8                                                  | 9.2                                                 | 1.40X10 <sup>28</sup> | down                 | down           |
| FBN1      | 202766_s_at         | 8.5                                                  | 9.9                                                 | 1.40X10 <sup>29</sup> | down                 | down           |
| FBN1      | 235318_at           | 5.6                                                  | 6.8                                                 | 1.08X10 <sup>25</sup> | down                 | down           |
| ROBO1     | 213194_at           | 8.2                                                  | 8.8                                                 | 8.23X10 <sup>06</sup> | down                 | down           |
| TNC       | 201645_at           | 8.2                                                  | 9.5                                                 | 1.38X10 <sup>15</sup> | down                 | down           |
| TNC       | 216005_at           | 5.1                                                  | 5.8                                                 | 2.40X10 <sup>10</sup> | down                 | down           |
| LEF1      | 210948_s_at         | 5.7                                                  | 6.0                                                 | 8.79X10 <sup>03</sup> | down                 | down           |
| LEF1      | 221557_s_at         | 5.9                                                  | 5.8                                                 | 3.25X10 <sup>03</sup> | up                   | down           |
| LEF1      | 221558_s_at         | 8.1                                                  | 8.5                                                 | 7.52X10 <sup>03</sup> | down                 | down           |
| LAMC2     | 202267_at           | 8.6                                                  | 8.9                                                 | 3.25X10 <sup>03</sup> | down                 | down           |
| LAMC2     | 207517_at           | 6.3                                                  | 6.5                                                 | 7.94X10 <sup>04</sup> | down                 | down           |
| TGFB2     | 209908_s_at         | 4.5                                                  | 4.6                                                 | 3.69X10 <sup>02</sup> | down                 | down           |
| TGFB2     | 209909_s_at         | 4.4                                                  | 4.6                                                 | 2.63X10 <sup>02</sup> | down                 | down           |
| TGFB2     | 220406_at           | 6.6                                                  | 6.6                                                 | 6.96X10 <sup>01</sup> | down                 | down           |
| TGFB2     | 220407_s_at         | 6.4                                                  | 6.5                                                 | 1.89X10 <sup>02</sup> | down                 | down           |
| TGFB2     | 228121_at           | 6.9                                                  | 7.5                                                 | 4.45X10 <sup>11</sup> | down                 | down           |
| SERPINE1  | 1568765_at          | 5.8                                                  | 6.1                                                 | 1.72X10 <sup>07</sup> | down                 | down           |
| SERPINE1  | 202627_s_at         | 7.6                                                  | 8.7                                                 | 2.64X10 <sup>21</sup> | down                 | down           |

|          |              |      |      |                       |      |      |
|----------|--------------|------|------|-----------------------|------|------|
| SERPINE1 | 202628_s_at  | 7.4  | 8.6  | 4.68X10 <sup>20</sup> | down | down |
| AXL      | 202685_s_at  | 7.7  | 7.8  | 3.48X10 <sup>02</sup> | down | down |
| AXL      | 202686_s_at  | 7.7  | 8.5  | 3.47X10 <sup>16</sup> | down | down |
| MMP14    | 160020_at    | 8.7  | 9.1  | 1.66X10 <sup>10</sup> | down | down |
| MMP14    | 202827_s_at  | 7.9  | 8.3  | 1.30X10 <sup>06</sup> | down | down |
| MMP14    | 202828_s_at  | 8.0  | 8.4  | 9.90X10 <sup>09</sup> | down | down |
| MMP14    | 217279_x_at  | 8.0  | 8.2  | 2.20X10 <sup>09</sup> | down | down |
| PLAU     | 205479_s_at  | 8.5  | 9.4  | 3.32X10 <sup>16</sup> | down | down |
| PLAU     | 211668_s_at  | 8.0  | 8.8  | 3.47X10 <sup>16</sup> | down | down |
| TGFBR2   | 207334_s_at  | 6.9  | 7.1  | 1.00X10 <sup>02</sup> | down | down |
| TGFBR2   | 208944_at    | 9.9  | 10.1 | 1.76X10 <sup>02</sup> | down | down |
| LAMB3    | 209270_at    | 9.0  | 9.0  | 4.71X10 <sup>01</sup> | down | down |
| JUN      | 201464_x_at  | 11.3 | 11.5 | 1.25X10 <sup>02</sup> | down | down |
| JUN      | 201465_s_at  | 8.7  | 8.3  | 4.71X10 <sup>03</sup> | up   | down |
| JUN      | 201466_s_at  | 10.1 | 10.0 | 4.23X10 <sup>01</sup> | up   | down |
| ITGA2    | 205032_at    | 8.9  | 8.9  | 8.24X10 <sup>01</sup> | up   | down |
| ITGA2    | 227314_at    | 10.0 | 9.9  | 5.58X10 <sup>01</sup> | up   | down |
| LAMA4    | 202202_s_at  | 8.4  | 9.2  | 8.00X10 <sup>22</sup> | down | down |
| LAMA4    | 210089_s_at  | 6.7  | 7.1  | 1.11X10 <sup>10</sup> | down | down |
| LAMA4    | 210989_at    | 4.6  | 4.7  | 1.00X10 <sup>02</sup> | down | down |
| LAMA4    | 210990_s_at  | 6.3  | 6.5  | 3.56X10 <sup>07</sup> | down | down |
| LAMA4    | 216081_at    | 6.6  | 6.4  | 1.03X10 <sup>02</sup> | up   | down |
| ZEB1     | 210875_s_at  | 5.9  | 7.0  | 2.19X10 <sup>19</sup> | down | down |
| ZEB1     | 212758_s_at  | 7.2  | 7.6  | 8.62X10 <sup>08</sup> | down | down |
| ZEB1     | 212764_at    | 8.0  | 9.1  | 4.77X10 <sup>18</sup> | down | down |
| ZEB1     | 239952_at    | 6.1  | 6.3  | 3.02X10 <sup>07</sup> | down | down |
| PLAUR    | 210845_s_at  | 9.5  | 10.0 | 1.71X10 <sup>08</sup> | down | down |
| PLAUR    | 211924_s_at  | 8.9  | 9.4  | 1.10X10 <sup>07</sup> | down | down |
| PLAUR    | 214866_at    | 7.9  | 8.1  | 2.81X10 <sup>02</sup> | down | down |
| MMP16    | 207012_at    | 4.6  | 4.8  | 2.69X10 <sup>05</sup> | down | down |
| MMP16    | 207013_s_at  | 7.0  | 7.1  | 2.03X10 <sup>02</sup> | down | down |
| MMP16    | 208166_at    | 4.2  | 4.3  | 4.49X10 <sup>01</sup> | down | down |
| MMP16    | 208167_s_at  | 5.0  | 5.0  | 1.89X10 <sup>01</sup> | down | down |
| MMP16    | 223614_at    | 5.3  | 5.8  | 8.95X10 <sup>12</sup> | down | down |
| ITGB3    | 204625_s_at  | 5.5  | 5.4  | 1.54X10 <sup>02</sup> | up   | down |
| ITGB3    | 204626_s_at  | 6.5  | 6.6  | 2.88X10 <sup>01</sup> | down | down |
| ITGB3    | 204627_s_at  | 5.4  | 5.8  | 8.75X10 <sup>14</sup> | down | down |
| ITGB3    | 204628_s_at  | 7.1  | 7.0  | 6.21X10 <sup>02</sup> | up   | down |
| ITGB3    | 211579_at    | 5.5  | 5.5  | 9.06X10 <sup>01</sup> | up   | down |
| ITGB3    | 215240_at    | 3.8  | 3.8  | 1.22X10 <sup>01</sup> | down | down |
| ITGB3    | 216261_at    | 6.4  | 6.5  | 7.94X10 <sup>04</sup> | down | down |
| ETS1     | 1555355_a_at | 7.1  | 7.7  | 4.62X10 <sup>10</sup> | down | down |
| ETS1     | 214447_at    | 7.2  | 7.4  | 1.98X10 <sup>03</sup> | down | down |
| ETS1     | 224833_at    | 9.5  | 10.1 | 2.03X10 <sup>18</sup> | down | down |
| STAT5B   | 1555086_at   | 8.2  | 8.2  | 2.11X10 <sup>01</sup> | down | down |
| STAT5B   | 1555088_x_at | 8.4  | 8.4  | 2.27X10 <sup>01</sup> | down | down |
| STAT5B   | 205026_at    | 6.5  | 6.6  | 2.59X10 <sup>01</sup> | down | down |

|        |              |      |      |            |      |      |
|--------|--------------|------|------|------------|------|------|
| STAT5B | 212549_at    | 8.3  | 8.5  | 8.38X10^05 | down | down |
| STAT5B | 212550_at    | 7.5  | 7.5  | 6.61X10^01 | down | down |
| ITGBL1 | 1557079_at   | 3.6  | 3.7  | 1.45X10^03 | down | down |
| ITGBL1 | 1557080_s_at | 5.3  | 6.2  | 4.42X10^08 | down | down |
| ITGBL1 | 205422_s_at  | 5.8  | 7.1  | 2.77X10^12 | down | down |
| ITGBL1 | 214927_at    | 6.4  | 7.1  | 1.12X10^08 | down | down |
| ITGBL1 | 231993_at    | 4.9  | 5.6  | 2.85X10^08 | down | down |
| LAMB1  | 201505_at    | 9.3  | 9.5  | 2.74X10^03 | down | down |
| LAMB1  | 211651_s_at  | 9.0  | 9.3  | 2.45X10^03 | down | down |
| ITGA5  | 201389_at    | 8.1  | 8.7  | 2.34X10^16 | down | down |
| RAC2   | 207419_s_at  | 7.5  | 7.7  | 3.26X10^02 | down | down |
| RAC2   | 213603_s_at  | 9.2  | 9.5  | 2.18X10^04 | down | down |
| ITGA3  | 201474_s_at  | 8.1  | 8.1  | 8.26X10^01 | down | down |
| LAMC1  | 200770_s_at  | 9.1  | 9.4  | 1.72X10^07 | down | down |
| LAMC1  | 200771_at    | 9.8  | 10.4 | 1.85X10^19 | down | down |
| WNT5A  | 205990_s_at  | 9.1  | 9.5  | 4.71X10^03 | down | down |
| WNT5A  | 213425_at    | 8.1  | 8.4  | 1.46X10^02 | down | down |
| WNT5A  | 231227_at    | 6.4  | 6.6  | 6.76X10^02 | down | down |
| SMAD3  | 205396_at    | 6.7  | 6.8  | 1.54X10^01 | down | down |
| SMAD3  | 205397_x_at  | 7.3  | 7.3  | 6.61X10^01 | up   | down |
| SMAD3  | 205398_s_at  | 7.3  | 7.4  | 1.54X10^02 | down | down |
| SMAD3  | 218284_at    | 8.6  | 8.7  | 4.64X10^01 | down | down |
| RND3   | 212724_at    | 10.5 | 10.6 | 4.98X10^02 | down | down |
| TJP2   | 202085_at    | 10.5 | 10.4 | 3.06X10^02 | up   | down |
| TJP2   | 232017_at    | 7.8  | 7.8  | 8.43X10^01 | up   | down |
| TJP2   | 237132_at    | 5.3  | 5.3  | 7.75X10^01 | down | down |
| TJP2   | 242991_at    | 5.1  | 5.1  | 1.62X10^02 | up   | down |
| TPM1   | 1558532_at   | 5.7  | 5.8  | 2.15X10^01 | down | down |
| TPM1   | 206116_s_at  | 10.0 | 10.6 | 1.22X10^10 | down | down |
| TPM1   | 206117_at    | 6.8  | 7.3  | 2.27X10^11 | down | down |
| TPM1   | 210986_s_at  | 11.7 | 12.1 | 2.69X10^10 | down | down |
| TPM1   | 210987_x_at  | 11.0 | 11.5 | 3.54X10^14 | down | down |
| TPM1   | 238688_at    | 8.0  | 8.1  | 3.42X10^02 | down | down |
| CDH4   | 1563587_at   | 5.9  | 5.8  | 3.11X10^04 | up   | down |
| CDH4   | 206866_at    | 5.7  | 5.5  | 8.42X10^04 | up   | down |
| CDH4   | 220227_at    | 6.4  | 6.3  | 9.55X10^02 | up   | down |
| CDH4   | 239485_at    | 6.2  | 6.1  | 6.10X10^02 | up   | down |
| ITGAV  | 202351_at    | 10.7 | 11.2 | 5.67X10^14 | down | down |
| ITGA6  | 201656_at    | 10.9 | 10.8 | 1.24X10^01 | up   | down |
| ITGA6  | 215177_s_at  | 10.3 | 10.2 | 4.64X10^01 | up   | down |
| PCDHB9 | 223927_at    | 7.1  | 7.2  | 1.76X10^02 | down | down |
| PCDH18 | 225975_at    | 8.7  | 9.1  | 2.01X10^04 | down | down |
| PCDH18 | 225977_at    | 7.1  | 7.2  | 1.03X10^01 | down | down |
| STAT3  | 208991_at    | 11.1 | 11.1 | 2.25X10^01 | down | down |
| STAT3  | 208992_s_at  | 10.2 | 10.3 | 2.27X10^01 | down | down |
| STAT3  | 225289_at    | 9.3  | 9.4  | 1.22X10^01 | down | down |
| STAT3  | 243213_at    | 6.8  | 6.9  | 4.01X10^03 | down | down |

|       |              |      |      |                       |      |      |
|-------|--------------|------|------|-----------------------|------|------|
| EGFR  | 1565483_at   | 9.5  | 9.9  | 2.17X10 <sup>02</sup> | down | down |
| EGFR  | 1565484_x_at | 9.2  | 9.7  | 1.34X10 <sup>02</sup> | down | down |
| EGFR  | 201983_s_at  | 9.0  | 8.6  | 7.06X10 <sup>05</sup> | up   | down |
| EGFR  | 201984_s_at  | 8.5  | 8.3  | 3.54X10 <sup>02</sup> | up   | down |
| EGFR  | 210984_x_at  | 8.2  | 7.9  | 7.00X10 <sup>08</sup> | up   | down |
| EGFR  | 211550_at    | 6.2  | 6.1  | 2.45X10 <sup>02</sup> | up   | down |
| EGFR  | 211551_at    | 6.5  | 6.4  | 4.42X10 <sup>02</sup> | up   | down |
| EGFR  | 211607_x_at  | 7.8  | 7.6  | 3.13X10 <sup>06</sup> | up   | down |
| LAMA3 | 1560078_at   | 6.3  | 6.4  | 6.76X10 <sup>02</sup> | down | down |
| LAMA3 | 1563772_a_at | 6.5  | 6.4  | 6.39X10 <sup>03</sup> | up   | down |
| LAMA3 | 1568879_a_at | 7.2  | 7.2  | 3.88X10 <sup>01</sup> | down | down |
| LAMA3 | 203726_s_at  | 8.8  | 9.0  | 2.87X10 <sup>01</sup> | down | down |
| LAMA3 | 234608_at    | 5.8  | 5.9  | 2.75X10 <sup>01</sup> | down | down |
| LAMA3 | 234719_at    | 5.9  | 5.8  | 3.57X10 <sup>03</sup> | up   | down |
| OCN   | 209925_at    | 8.1  | 7.9  | 1.11X10 <sup>01</sup> | up   | up   |
| OCN   | 227492_at    | 10.3 | 10.0 | 1.06X10 <sup>04</sup> | up   | up   |
| OCN   | 231022_at    | 8.5  | 8.2  | 2.69X10 <sup>05</sup> | up   | up   |
| FZD3  | 219683_at    | 6.9  | 7.0  | 4.03X10 <sup>01</sup> | down | up   |
| FZD3  | 227499_at    | 5.7  | 5.7  | 6.42X10 <sup>01</sup> | up   | up   |
| FZD3  | 227524_at    | 7.5  | 7.3  | 7.94X10 <sup>04</sup> | up   | up   |
| FZD3  | 239082_at    | 8.6  | 8.6  | 7.75X10 <sup>01</sup> | down | up   |
| TJP3  | 213412_at    | 7.8  | 7.4  | 3.35X10 <sup>09</sup> | up   | up   |
| TJP3  | 35148_at     | 8.3  | 8.0  | 6.47X10 <sup>07</sup> | up   | up   |
| PDGFB | 204200_s_at  | 6.5  | 6.7  | 2.19X10 <sup>08</sup> | down | up   |
| PDGFB | 216055_at    | 5.4  | 5.4  | 7.61X10 <sup>01</sup> | down | up   |
| PDGFB | 216061_x_at  | 7.4  | 7.5  | 9.96X10 <sup>04</sup> | down | up   |
| PDGFB | 217112_at    | 5.7  | 5.5  | 3.35X10 <sup>07</sup> | up   | up   |
| RAC3  | 206103_at    | 6.2  | 6.2  | 8.82X10 <sup>01</sup> | up   | up   |
| BMP7  | 209590_at    | 7.4  | 7.4  | 8.19X10 <sup>01</sup> | up   | up   |
| BMP7  | 209591_s_at  | 6.4  | 6.4  | 9.64X10 <sup>01</sup> | down | up   |
| BMP7  | 211259_s_at  | 6.2  | 6.0  | 3.43X10 <sup>02</sup> | up   | up   |
| BMP7  | 211260_at    | 7.1  | 6.8  | 5.16X10 <sup>08</sup> | up   | up   |
| BMP4  | 211518_s_at  | 9.4  | 9.3  | 6.69X10 <sup>01</sup> | up   | up   |
| TPM2  | 204083_s_at  | 9.3  | 10.4 | 2.03X10 <sup>18</sup> | down | up   |
| TPM2  | 212654_at    | 6.4  | 6.7  | 8.08X10 <sup>06</sup> | down | up   |
| TPM2  | 227397_at    | 6.4  | 6.3  | 5.82X10 <sup>03</sup> | up   | up   |
| TPM2  | 229911_at    | 6.4  | 6.3  | 5.62X10 <sup>03</sup> | up   | up   |
| CLDN4 | 1569421_at   | 7.2  | 7.2  | 4.93X10 <sup>01</sup> | down | up   |
| CLDN4 | 201428_at    | 10.2 | 10.0 | 9.87X10 <sup>03</sup> | up   | up   |
| WNT16 | 221113_s_at  | 6.6  | 6.6  | 3.81X10 <sup>01</sup> | down | up   |
| WNT16 | 224022_x_at  | 3.7  | 3.8  | 1.11X10 <sup>01</sup> | down | up   |
| CDH1  | 201130_s_at  | 9.0  | 8.8  | 1.20X10 <sup>01</sup> | up   | up   |
| CDH1  | 201131_s_at  | 12.0 | 11.7 | 1.98X10 <sup>03</sup> | up   | up   |
| CLDN7 | 202790_at    | 11.0 | 10.8 | 1.34X10 <sup>02</sup> | up   | up   |
| RAB25 | 218186_at    | 10.6 | 10.4 | 8.53X10 <sup>04</sup> | up   | up   |
| CD109 | 226545_at    | 6.8  | 8.1  | 6.95X10 <sup>14</sup> | down | up   |
| CD109 | 229900_at    | 6.0  | 6.4  | 9.69X10 <sup>08</sup> | down | up   |

|       |             |      |      |                       |      |    |
|-------|-------------|------|------|-----------------------|------|----|
| CD109 | 239719_at   | 6.7  | 6.7  | 3.82X10 <sup>01</sup> | down | up |
| EPCAM | 201839_s_at | 12.9 | 12.7 | 6.38X10 <sup>03</sup> | up   | up |

**Table S5. Clinicopathological and molecular associations for *FOSL1* expression levels in stage B and C CRC patients.** P-values are for the  $\chi^2$  test for categorical variables and the Wilcoxon rank-sum test for continuous variables.

| Characteristic                | All cases<br>N | <i>FOSL1</i> <sup>low</sup><br>N (%) | <i>FOSL1</i> <sup>high</sup><br>N (%) | P-value       |
|-------------------------------|----------------|--------------------------------------|---------------------------------------|---------------|
| Total                         | 185            | 146 (80.2)                           | 36 (19.8)                             |               |
| FRA1 <sup>EMT</sup> signature |                |                                      |                                       |               |
| Epithelial                    | 149            | 81 (85.3)                            | 14 (14.7)                             |               |
| Mesenchymal                   | 36             | 68 (74.7)                            | 22(25.3)                              | 0.11          |
| Age                           |                |                                      |                                       |               |
| Median (range)                | 67, 26-92      | 67 (26-92)                           | 69 (30-90)                            | 0.679         |
| Gender                        |                |                                      |                                       |               |
| Male                          | 98             | 83 (84.7)                            | 15 (15.3)                             | 0.169         |
| Female                        | 87             | 66 (75.9)                            | 21 (24.1)                             |               |
| Tumour location               |                |                                      |                                       |               |
| Colon                         | 163            | 129 (79.1)                           | 34 (20.9)                             | 0.307         |
| Rectum                        | 22             | 20 (90.9)                            | 2 (9.1)                               |               |
| Tumor stage                   |                |                                      |                                       |               |
| B                             | 91             | 70 (76.9)                            | 21 (23.1)                             | 0.3           |
| C                             | 94             | 79 (84.0)                            | 15 (16.0)                             |               |
| T stage                       |                |                                      |                                       |               |
| 2                             | 9              | 9 (100)                              | 0 (0)                                 |               |
| 3                             | 163            | 133 (81.6)                           | 30 (18.4)                             |               |
| 4                             | 13             | 7 (53.8)                             | 6 (46.2)                              | <b>0.017*</b> |
| N stage                       |                |                                      |                                       |               |
| 0                             | 91             | 76 (83.5)                            | 15 (16.5)                             |               |
| 1                             | 66             | 51 (77.3)                            | 15 (22.7)                             |               |
| 2                             | 25             | 19 (76.0)                            | 6 (24.0)                              | 0.531         |
| Unknown                       | 3              | -                                    | -                                     |               |

**Table S6. Clinicopathological and molecular associations for FRA1<sup>EMT</sup> signature in stage B and C CRC patients.** P-values are for the  $\chi^2$  test for categorical variables and the Wilcoxon rank-sum test for continuous variables.

| Characteristic                | All cases<br>N | Epithelial signature<br>N (%) | Mesenchymal signature<br>N (%) | P-value        |
|-------------------------------|----------------|-------------------------------|--------------------------------|----------------|
| Total                         | 185            | 95 (51.3)                     | 90 (48.6)                      |                |
| FRA1 <sup>EMT</sup> signature |                |                               |                                |                |
| Epithelial                    | 149            | 81 (54.4)                     | 68 (45.6)                      |                |
| Mesenchymal                   | 36             | 14 (38.9)                     | 22 (61.1)                      | 0.139          |
| Age                           |                |                               |                                |                |
| Median (range)                | 67 (26-92)     | 70 (26-92)                    | 64 (26-92)                     | 0.005*         |
| Gender                        |                |                               |                                |                |
| Male                          | 98             | 82 (54.1)                     | 45 (45.9)                      | 0.521          |
| Female                        | 87             | 42 (48.3)                     | 21 (51.7)                      |                |
| Tumour location               |                |                               |                                |                |
| Colon                         | 163            | 82 (50.3)                     | 81 (49.7)                      | 0.585          |
| Rectum                        | 22             | 13 (59.1)                     | 9 (40.9)                       |                |
| Tumor stage                   |                |                               |                                |                |
| B                             | 94             | 52 (55.3)                     | 42 (44.7)                      | 0.342          |
| C                             | 91             | 43 (47.3)                     | 48 (52.7)                      |                |
| T stage                       |                |                               |                                |                |
| 2                             | 9              | 6 (66.7)                      | 3 (33.3)                       | 0.622          |
| 3                             | 163            | 82 (50.3)                     | 81 (49.7)                      |                |
| 4                             | 13             | 7 (53.8)                      | 6 (46.2)                       |                |
| N stage                       |                |                               |                                |                |
| 0                             | 91             | 52 (57.1)                     | 39 (42.9)                      |                |
| 1                             | 66             | 37 (56.1)                     | 29 (43.9)                      |                |
| 2                             | 25             | 6 (24.0)                      | 19 (76.0)                      | <b>0.0098*</b> |
| Unknown                       | 3              | -                             | -                              |                |



**Table S7. Univariate and multivariate Cox proportional-hazards analysis of survival for stage B and C colorectal cancer patients according to *FOSL1* expression and the concordant *FRA1*<sup>EMT</sup> gene expression patterns. P-values are for the Wald test.**

| Molecular Feature                         | N   | Events/<br>years obs. | Univariate model  |         | Multivariate model |         |
|-------------------------------------------|-----|-----------------------|-------------------|---------|--------------------|---------|
|                                           |     |                       | HR (95% CI)       | P-value | HR (95% CI)        | P-value |
| Total                                     | 182 | 47/640.2              |                   |         |                    |         |
| Classifier                                |     |                       |                   |         |                    |         |
| <i>FOSL1</i> <sup>low</sup> /epithelial   | 81  | 10/300.0              | 1 (Referent)      |         | 1 (Referent)       |         |
| <i>FOSL1</i> <sup>high</sup> /epithelial  | 14  | 5/45.95               | 3.26 (1.11-9.53)  | 0.03    | 3.38 (1.10-10.46)  | 0.03    |
| <i>FOSL1</i> <sup>low</sup> /mesenchymal  | 65  | 14/44.22              | 2.12 (0.97-4.64)  | 0.06    | 1.70 (0.75-1.17)   | 0.21    |
| <i>FOSL1</i> <sup>high</sup> /mesenchymal | 22  | 18/250.1              | 8.16 (3.60-18.49) | <0.001  | 7.06 (3.03-16.48)  | <0.01   |
| Age                                       |     |                       |                   |         |                    |         |
| Age in decades                            |     |                       | 0.90 (0.73-1.11)  | 0.322   | 0.94 (0.75-1.17)   | 0.56    |
| Gender                                    |     |                       |                   |         |                    |         |
| Male                                      | 97  | 27/347.7              | 1 (Referent)      |         | 1 (Referent)       |         |
| Female                                    | 85  | 20/292.5              | 0.87 (0.49-1.55)  | 0.635   | 0.91 (0.48-1.71)   | 0.76    |
| Tumor location                            |     |                       |                   |         |                    |         |
| Colon                                     | 160 | 41/556.1              | 1 (Referent)      |         | 1 (Referent)       |         |
| Rectum                                    | 22  | 6/84.0                | 1.01 (0.43-2.39)  | 0.975   | 1.32 (0.52-3.33)   | 0.55    |
| Tumor stage                               |     |                       |                   |         |                    |         |
| B                                         | 91  | 13/336.4              | 1 (Referent)      |         | 1 (Referent)       |         |
| C, N1                                     | 66  | 20/227.2              | 2.37 (1.18-4.76)  | 0.016   | 2.32 (1.07-5.05)   | 0.03*   |
| C, N2                                     | 25  | 14/76.5               | 4.56 (2.14-9.71)  | <0.001  | 3.06 (1.76-9.37)   | 0.001*  |
| Adjuvant treatment                        |     |                       |                   |         |                    |         |
| No                                        | 98  | 20/269.8              | 1 (Referent)      |         | 1 (Referent)       |         |
| Yes                                       | 84  | 27/298.2              | 1.5 (0.84-2.68)   | 0.17    | 0.84 (0.42-1.67)   | 0.62    |

**Table S8. List of qRT-PCR and ChIP primers used in this study.**

**Primers used for ChIP**

| Gene         | Forward primer        | Reverse primer        | Product size |
|--------------|-----------------------|-----------------------|--------------|
| <i>AXL</i>   | AGGAGGCAGGGGTGCTGAGA  | ACGCCATGGGTGCCAAACTT  | 193bp        |
| <i>BMP4</i>  | TCTGCCTGTCTCCCCTCACC  | TGGGATTCCCGTCCAAGCTA  | 164bp        |
| <i>BMP7</i>  | GGCCCTGGGTACTGAAGACG  | GAGATGCAGCGCGAGATCCT  | 190bp        |
| <i>FN1</i>   | TGGGGCTGAACCATTTGCTG  | TTTTCCCGCAGGTTGCGAAG  | 200bp        |
| <i>FOSL1</i> | GCCTTCGACGTACCCCTGGA  | TCCACCTGGTGCCAAGCATC  | 183bp        |
| <i>LEF1</i>  | TGGCCGGGATGATTTGAGAC  | CCACAGCGGAGCGGAGATTA  | 232bp        |
| <i>SNAI2</i> | TAATCCAGCCCAGCCCCATC  | CGTCTGACTCACGCCATCAGC | 223bp        |
| <i>TGFB2</i> | TGGAGTAACCAAGCGGGTCA  | GCGTGCGTGTGTGTGTGTGT  | 219bp        |
| <i>VIM</i>   | CCGCTAGGAGCCCTCAATCGG | TTCGGACGGCGGGAGTTGCG  | 126bp        |
| <i>ZEB1</i>  | CCTGGTCTCTCTCCGCCTAGC | AGAAGCAACAGCCGCTCCAC  | 151bp        |

**Primers used for RT-PCR**

| Gene         | Forward primer               | Reverse primer           | Product size |
|--------------|------------------------------|--------------------------|--------------|
| <i>AXL</i>   | GAGAACATTAGTGCTACGCGGAA      | CCTTAGCCCTATGTCCATTAGCA  | 124bp        |
| <i>BMP4</i>  | GCATTCGGTTACCAGGAATC         | TGAGCCTTTCCAGCAAGTTT     | 106bp        |
| <i>BMP7</i>  | CTTCCCCTTCTGGGATCTTG         | GATAGCCATTTCTCACCAG      | 136bp        |
| <i>CDLN7</i> | CACCAGGGAGACCACCATTA         | ATGTACAAGGGGCTGTGGAT     | 132bp        |
| <i>EPCAM</i> | AGAACCTACTGGATCATCATTGAACTAA | CGCGTTGTGATCTCCTTCTG     | 100bp        |
| <i>FN1</i>   | CCATCAAGCCAGATGTCAGAAGCT     | GGATGGTGCATCAATGGCA      | 139bp        |
| <i>FOSL1</i> | CACCGACCCATCTGCAAA           | CACTGGTACTGCCTGTGT       | 60bp         |
| <i>LAMC2</i> | CAGCGGAATCCATTACCAGT         | TGCTTCTCGCTCCTCCTG       | 128bp        |
| <i>SNAI2</i> | CATGAGGAATCTGGCTGCTGTGTA     | GCACAGGAGAAAATGCCTTTGGAC | 123bp        |
| <i>TGFB2</i> | CTCCATTGCTGAGACGTCAA         | CGACGAAGAGTACTACGCCA     | 133bp        |
| <i>TGFBI</i> | TTGAGAGTGGTAGGGCTGCT         | CCAAAGGAAAATCTGTGGCA     | 107bp        |
| <i>VIM</i>   | CGCCAGATGCGTGAAATGG          | ACCAGAGGGAGTGAATCCAGA    | 278bp        |
| <i>ZEB1</i>  | GCACCTGAAGAGGACCAGAG         | TGGTGATGCTGAAAGAGACG     | 537bp        |
| <i>ZEB2</i>  | CAAGAGGCGCAAACAAGC           | GGTTGGCAATACCGTCATCC     | 127bp        |
